# Supplementary material
Source: publisher site journal article supplement (https://www.dovepress.com/article/470087)
Supplement: Supplementary file 1 [file get_supplementary_file.php]

**Supplementary Material**

**Table S1** GO enrichment items information for DE-BMRGs.

| ONTOLOGY | ID | Description | GeneRatio | BgRatio | pvalue | p.adjust | qvalue | geneID | Count |
| --- | --- | --- | --- | --- | --- | --- | --- | --- | --- |
| BP | GO:0048872 | homeostasis of number of cells | 12/203 | 272/18723 | 4.36E-05 | 0.082169372 | 0.070642052 | INHBA/GLIS2/BCL2/SOX4/RAC3/NCSTN/ETV2/LIPA/DOCK11/LYN/ZBTB7A/LYAR | 12 |
| BP | GO:0016032 | viral process | 15/203 | 415/18723 | 4.96E-05 | 0.082169372 | 0.070642052 | OAS1/DEK/MX1/MAN2A1/BCL2/ATG16L1/VPS37B/IFI27/EDEM2/CSDE1/CFL1/CHMP7/DDX6/BSG/ITGA2 | 15 |
| BP | GO:0071107 | response to parathyroid hormone | 3/203 | 12/18723 | 0.000257055 | 0.086754679 | 0.074584098 | GJA1/WNT10B/ITGA2 | 3 |
| BP | GO:0051250 | negative regulation of lymphocyte activation | 8/203 | 157/18723 | 0.000320149 | 0.086754679 | 0.074584098 | INHBA/LAPTM5/FGL2/TWSG1/LYN/PTPN6/PRNP/SOCS5 | 8 |
| BP | GO:1990845 | adaptive thermogenesis | 8/203 | 157/18723 | 0.000320149 | 0.086754679 | 0.074584098 | GJA1/WNT10B/KDM1A/UCP2/UCP3/TLE3/GADD45G/ADIPOR1 | 8 |
| BP | GO:0016055 | Wnt signaling pathway | 14/203 | 444/18723 | 0.000362272 | 0.086754679 | 0.074584098 | FGF2/DKK2/WNT10B/EMD/RPS12/SOX4/RAC3/WNT2/ETV2/UBE2B/CALCOCO1/PRICKLE2/TLE3/GNAQ | 14 |
| BP | GO:0198738 | cell-cell signaling by wnt | 14/203 | 446/18723 | 0.000378934 | 0.086754679 | 0.074584098 | FGF2/DKK2/WNT10B/EMD/RPS12/SOX4/RAC3/WNT2/ETV2/UBE2B/CALCOCO1/PRICKLE2/TLE3/GNAQ | 14 |
| BP | GO:0046879 | hormone secretion | 11/203 | 295/18723 | 0.000390596 | 0.086754679 | 0.074584098 | GJA1/INHBA/GIPR/SOX4/UCP2/LYN/RAB11B/ADORA1/ICA1/FOXA2/PICK1 | 11 |
| BP | GO:0006874 | cellular calcium ion homeostasis | 14/203 | 448/18723 | 0.000396248 | 0.086754679 | 0.074584098 | GJA1/FGF2/ATP7B/BCL2/GIPR/HRC/LPAR1/LYN/PTPN6/ADORA1/DMPK/PRNP/NPTN/GSTO1 | 14 |
| BP | GO:0006936 | muscle contraction | 12/203 | 347/18723 | 0.000422319 | 0.086754679 | 0.074584098 | GJA1/CKMT2/EMD/FXYD1/HRC/TPM4/ADORA1/DMPK/GSTO1/SYNM/CALD1/ITGA2 | 12 |
| BP | GO:0031647 | regulation of protein stability | 11/203 | 298/18723 | 0.000425309 | 0.086754679 | 0.074584098 | BCL2/WNT10B/PFN1/SOX4/UBE2B/ZSWIM7/ATP1B2/PRNP/TCP1/PINX1/GNAQ | 11 |
| BP | GO:0048333 | mesodermal cell differentiation | 4/203 | 33/18723 | 0.0004291 | 0.086754679 | 0.074584098 | GJA1/INHBA/ETV2/ITGA2 | 4 |
| BP | GO:0042886 | amide transport | 11/203 | 301/18723 | 0.000462574 | 0.086754679 | 0.074584098 | GJA1/GIPR/SOX4/UCP2/PLEKHA8/RAB11B/ADORA1/ICA1/FOXA2/PICK1/ABCA13 | 11 |
| BP | GO:0051480 | regulation of cytosolic calcium ion concentration | 12/203 | 353/18723 | 0.000491973 | 0.086754679 | 0.074584098 | GJA1/FGF2/BCL2/GIPR/HRC/LPAR1/LYN/PTPN6/ADORA1/PRNP/NPTN/GSTO1 | 12 |
| BP | GO:0005996 | monosaccharide metabolic process | 10/203 | 257/18723 | 0.00051475 | 0.086754679 | 0.074584098 | OAS1/DCXR/MAN2A1/CHST15/MAN2B1/GSTO1/PGM2L1/ADIPOR1/G6PC3/FOXA2 | 10 |
| BP | GO:0055074 | calcium ion homeostasis | 14/203 | 460/18723 | 0.000515008 | 0.086754679 | 0.074584098 | GJA1/FGF2/ATP7B/BCL2/GIPR/HRC/LPAR1/LYN/PTPN6/ADORA1/DMPK/PRNP/NPTN/GSTO1 | 14 |
| BP | GO:0009914 | hormone transport | 11/203 | 306/18723 | 0.000530756 | 0.086754679 | 0.074584098 | GJA1/INHBA/GIPR/SOX4/UCP2/LYN/RAB11B/ADORA1/ICA1/FOXA2/PICK1 | 11 |
| BP | GO:0051052 | regulation of DNA metabolic process | 12/203 | 359/18723 | 0.000571074 | 0.086754679 | 0.074584098 | GJA1/FGF2/DEK/ACTR2/KDM1A/UBE2B/FUS/TCP1/DDX39B/PAM16/PINX1/TERF2 | 12 |
| BP | GO:0001659 | temperature homeostasis | 8/203 | 174/18723 | 0.000634727 | 0.086754679 | 0.074584098 | GJA1/WNT10B/KDM1A/UCP2/ADORA1/TLE3/GADD45G/ADIPOR1 | 8 |
| BP | GO:0051607 | defense response to virus | 10/203 | 265/18723 | 0.000652737 | 0.086754679 | 0.074584098 | OAS1/FGL2/MX1/BCL2/IFI27/TLR7/RNASE2/IRF2/TRAF3/IFIT3 | 10 |
| BP | GO:0140546 | defense response to symbiont | 10/203 | 265/18723 | 0.000652737 | 0.086754679 | 0.074584098 | OAS1/FGL2/MX1/BCL2/IFI27/TLR7/RNASE2/IRF2/TRAF3/IFIT3 | 10 |
| BP | GO:0009615 | response to virus | 12/203 | 367/18723 | 0.000692964 | 0.086754679 | 0.074584098 | OAS1/FGL2/MX1/BCL2/IFI27/TLR7/RNASE2/CFL1/IRF2/TRAF3/IFIT3/HNRNPUL1 | 12 |
| BP | GO:0019058 | viral life cycle | 11/203 | 317/18723 | 0.000710726 | 0.086754679 | 0.074584098 | OAS1/DEK/MX1/BCL2/ATG16L1/VPS37B/IFI27/CHMP7/DDX6/BSG/ITGA2 | 11 |
| BP | GO:0010719 | negative regulation of epithelial to mesenchymal transition | 4/203 | 38/18723 | 0.000742007 | 0.086754679 | 0.074584098 | ADIPOR1/FOXA2/SPRED1/OVOL2 | 4 |
| BP | GO:0007204 | positive regulation of cytosolic calcium ion concentration | 11/203 | 319/18723 | 0.000748359 | 0.086754679 | 0.074584098 | GJA1/FGF2/BCL2/GIPR/HRC/LPAR1/LYN/PTPN6/PRNP/NPTN/GSTO1 | 11 |
| BP | GO:0001654 | eye development | 12/203 | 371/18723 | 0.000761657 | 0.086754679 | 0.074584098 | INHBA/FGF2/TWSG1/MAN2A1/BCL2/ALDH1A2/FKBP8/WNT2/BIRC7/FBN1/CLN8/SPRED1 | 12 |
| BP | GO:0070593 | dendrite self-avoidance | 3/203 | 17/18723 | 0.000763379 | 0.086754679 | 0.074584098 | IGSF9/BSG/NPTN | 3 |
| BP | GO:0043010 | camera-type eye development | 11/203 | 322/18723 | 0.000807907 | 0.086754679 | 0.074584098 | INHBA/FGF2/TWSG1/MAN2A1/ALDH1A2/FKBP8/WNT2/BIRC7/FBN1/CLN8/SPRED1 | 11 |
| BP | GO:0150063 | visual system development | 12/203 | 375/18723 | 0.000835963 | 0.086754679 | 0.074584098 | INHBA/FGF2/TWSG1/MAN2A1/BCL2/ALDH1A2/FKBP8/WNT2/BIRC7/FBN1/CLN8/SPRED1 | 12 |
| BP | GO:0010522 | regulation of calcium ion transport into cytosol | 6/203 | 102/18723 | 0.000856767 | 0.086754679 | 0.074584098 | BCL2/HRC/LYN/PTPN6/PRNP/GSTO1 | 6 |
| BP | GO:0072503 | cellular divalent inorganic cation homeostasis | 14/203 | 486/18723 | 0.000879451 | 0.086754679 | 0.074584098 | GJA1/FGF2/ATP7B/BCL2/GIPR/HRC/LPAR1/LYN/PTPN6/ADORA1/DMPK/PRNP/NPTN/GSTO1 | 14 |
| BP | GO:0051235 | maintenance of location | 11/203 | 327/18723 | 0.000915877 | 0.086754679 | 0.074584098 | GJA1/FGF2/ATP7B/HRC/SOAT1/LYN/FBN1/SREBF2/PTPN6/GSTO1/CDS2 | 11 |
| BP | GO:0048880 | sensory system development | 12/203 | 381/18723 | 0.000958721 | 0.086754679 | 0.074584098 | INHBA/FGF2/TWSG1/MAN2A1/BCL2/ALDH1A2/FKBP8/WNT2/BIRC7/FBN1/CLN8/SPRED1 | 12 |
| BP | GO:0106106 | cold-induced thermogenesis | 7/203 | 144/18723 | 0.000998149 | 0.086754679 | 0.074584098 | GJA1/WNT10B/KDM1A/UCP2/TLE3/GADD45G/ADIPOR1 | 7 |
| BP | GO:0120161 | regulation of cold-induced thermogenesis | 7/203 | 144/18723 | 0.000998149 | 0.086754679 | 0.074584098 | GJA1/WNT10B/KDM1A/UCP2/TLE3/GADD45G/ADIPOR1 | 7 |
| BP | GO:0002695 | negative regulation of leukocyte activation | 8/203 | 187/18723 | 0.001014349 | 0.086754679 | 0.074584098 | INHBA/LAPTM5/FGL2/TWSG1/LYN/PTPN6/PRNP/SOCS5 | 8 |
| BP | GO:0061515 | myeloid cell development | 5/203 | 71/18723 | 0.001039724 | 0.086754679 | 0.074584098 | ANXA2/FBN1/PTPN6/ZBTB7A/LYAR | 5 |
| BP | GO:0090263 | positive regulation of canonical Wnt signaling pathway | 6/203 | 106/18723 | 0.001047373 | 0.086754679 | 0.074584098 | FGF2/DKK2/WNT10B/RPS12/SOX4/UBE2B | 6 |
| BP | GO:2000278 | regulation of DNA biosynthetic process | 6/203 | 106/18723 | 0.001047373 | 0.086754679 | 0.074584098 | GJA1/FGF2/TCP1/DDX39B/PINX1/TERF2 | 6 |
| BP | GO:0042326 | negative regulation of phosphorylation | 12/203 | 385/18723 | 0.001048634 | 0.086754679 | 0.074584098 | INHBA/PRKAG2/FKBP8/LYN/PTPN6/UBE2B/PRNP/SOCS5/PPP5C/FOXA2/SPRED1/GNAQ | 12 |
| BP | GO:0001707 | mesoderm formation | 5/203 | 72/18723 | 0.001107613 | 0.086754679 | 0.074584098 | GJA1/INHBA/TWSG1/ETV2/ITGA2 | 5 |
| BP | GO:0033627 | cell adhesion mediated by integrin | 5/203 | 72/18723 | 0.001107613 | 0.086754679 | 0.074584098 | RAC3/LYN/FBN1/PTPN6/ITGA2 | 5 |
| BP | GO:0019318 | hexose metabolic process | 9/203 | 237/18723 | 0.001156438 | 0.086754679 | 0.074584098 | OAS1/DCXR/MAN2A1/CHST15/MAN2B1/PGM2L1/ADIPOR1/G6PC3/FOXA2 | 9 |
| BP | GO:0050821 | protein stabilization | 8/203 | 191/18723 | 0.001162028 | 0.086754679 | 0.074584098 | WNT10B/PFN1/SOX4/UBE2B/ZSWIM7/ATP1B2/TCP1/GNAQ | 8 |
| BP | GO:0072089 | stem cell proliferation | 5/203 | 73/18723 | 0.001178732 | 0.086754679 | 0.074584098 | GJA1/FGF2/WNT10B/KDM1A/OVOL2 | 5 |
| BP | GO:0048332 | mesoderm morphogenesis | 5/203 | 74/18723 | 0.001253175 | 0.090228614 | 0.077570684 | GJA1/INHBA/TWSG1/ETV2/ITGA2 | 5 |
| BP | GO:0030073 | insulin secretion | 8/203 | 195/18723 | 0.00132639 | 0.091703559 | 0.078838713 | GJA1/GIPR/SOX4/UCP2/RAB11B/ICA1/FOXA2/PICK1 | 8 |
| BP | GO:0002790 | peptide secretion | 9/203 | 242/18723 | 0.001336846 | 0.091703559 | 0.078838713 | GJA1/GIPR/SOX4/UCP2/RAB11B/ADORA1/ICA1/FOXA2/PICK1 | 9 |
| BP | GO:0003012 | muscle system process | 13/203 | 452/18723 | 0.001356725 | 0.091703559 | 0.078838713 | GJA1/CKMT2/EMD/FXYD1/HRC/TPM4/ADORA1/DMPK/GSTO1/SYNM/DDX39B/CALD1/ITGA2 | 13 |
| BP | GO:0042551 | neuron maturation | 4/203 | 45/18723 | 0.001411837 | 0.0935201 | 0.080400416 | BCL2/KDM1A/RAC3/PICK1 | 4 |
| BP | GO:1902307 | positive regulation of sodium ion transmembrane transport | 3/203 | 21/18723 | 0.001446161 | 0.093915404 | 0.080740264 | WNK4/FXYD1/ATP1B2 | 3 |
| BP | GO:0043462 | regulation of ATPase activity | 4/203 | 46/18723 | 0.001533324 | 0.095514724 | 0.08211522 | PFN1/ATP1B2/PXK/PAM16 | 4 |
| BP | GO:1900271 | regulation of long-term synaptic potentiation | 4/203 | 46/18723 | 0.001533324 | 0.095514724 | 0.08211522 | NCSTN/ADORA1/PRNP/NPTN | 4 |
| BP | GO:0002791 | regulation of peptide secretion | 8/203 | 200/18723 | 0.001557305 | 0.095514724 | 0.08211522 | GJA1/GIPR/SOX4/UCP2/ADORA1/ICA1/FOXA2/PICK1 | 8 |
| BP | GO:0046883 | regulation of hormone secretion | 9/203 | 249/18723 | 0.001626882 | 0.09652486 | 0.082983646 | GJA1/INHBA/GIPR/SOX4/UCP2/ADORA1/ICA1/FOXA2/PICK1 | 9 |
| BP | GO:0090087 | regulation of peptide transport | 8/203 | 202/18723 | 0.001658141 | 0.09652486 | 0.082983646 | GJA1/GIPR/SOX4/UCP2/ADORA1/ICA1/FOXA2/PICK1 | 8 |
| BP | GO:0050860 | negative regulation of T cell receptor signaling pathway | 3/203 | 22/18723 | 0.001661207 | 0.09652486 | 0.082983646 | LAPTM5/PTPN6/PRNP | 3 |
| BP | GO:0060070 | canonical Wnt signaling pathway | 10/203 | 303/18723 | 0.001789826 | 0.101182978 | 0.08698829 | FGF2/DKK2/WNT10B/EMD/RPS12/SOX4/WNT2/UBE2B/TLE3/GNAQ | 10 |
| BP | GO:0060828 | regulation of canonical Wnt signaling pathway | 9/203 | 253/18723 | 0.001814043 | 0.101182978 | 0.08698829 | FGF2/DKK2/WNT10B/EMD/RPS12/SOX4/UBE2B/TLE3/GNAQ | 9 |
| BP | GO:0060402 | calcium ion transport into cytosol | 7/203 | 160/18723 | 0.001833025 | 0.101182978 | 0.08698829 | FGF2/BCL2/HRC/LYN/PTPN6/PRNP/GSTO1 | 7 |
| BP | GO:0045943 | positive regulation of transcription by RNA polymerase I | 3/203 | 23/18723 | 0.001895227 | 0.102901521 | 0.088465743 | DHX33/LYAR/WDR43 | 3 |
| BP | GO:1904707 | positive regulation of vascular associated smooth muscle cell proliferation | 4/203 | 49/18723 | 0.001941178 | 0.103696463 | 0.089149165 | GJA1/FGF2/DDX39B/DNMT1 | 4 |
| BP | GO:0045165 | cell fate commitment | 9/203 | 258/18723 | 0.002071836 | 0.107868916 | 0.092736275 | FGF2/BCL2/WNT10B/FKBP8/WNT2/ETV2/PRRX1/FOXA2/TM2D3 | 9 |
| BP | GO:0050866 | negative regulation of cell activation | 8/203 | 210/18723 | 0.002114321 | 0.107868916 | 0.092736275 | INHBA/LAPTM5/FGL2/TWSG1/LYN/PTPN6/PRNP/SOCS5 | 8 |
| BP | GO:0050868 | negative regulation of T cell activation | 6/203 | 122/18723 | 0.002152261 | 0.107868916 | 0.092736275 | LAPTM5/FGL2/TWSG1/PTPN6/PRNP/SOCS5 | 6 |
| BP | GO:0051208 | sequestering of calcium ion | 6/203 | 122/18723 | 0.002152261 | 0.107868916 | 0.092736275 | FGF2/ATP7B/HRC/LYN/PTPN6/GSTO1 | 6 |
| BP | GO:0050796 | regulation of insulin secretion | 7/203 | 165/18723 | 0.002182131 | 0.107868916 | 0.092736275 | GJA1/GIPR/SOX4/UCP2/ICA1/FOXA2/PICK1 | 7 |
| BP | GO:0015833 | peptide transport | 9/203 | 264/18723 | 0.002418923 | 0.116277788 | 0.09996549 | GJA1/GIPR/SOX4/UCP2/RAB11B/ADORA1/ICA1/FOXA2/PICK1 | 9 |
| BP | GO:0086064 | cell communication by electrical coupling involved in cardiac conduction | 3/203 | 25/18723 | 0.002422454 | 0.116277788 | 0.09996549 | GJA1/HRC/ATP1B2 | 3 |
| BP | GO:0071496 | cellular response to external stimulus | 10/203 | 320/18723 | 0.002660228 | 0.125866785 | 0.108209272 | GJA1/PRKAG2/BCL2/TLR7/UCP2/LYN/SREBF2/FOXA2/PICK1/ITGA2 | 10 |
| BP | GO:0006517 | protein deglycosylation | 3/203 | 26/18723 | 0.002716728 | 0.12603407 | 0.108353089 | MAN2A1/EDEM2/MAN2B1 | 3 |
| BP | GO:2001020 | regulation of response to DNA damage stimulus | 8/203 | 219/18723 | 0.002739871 | 0.12603407 | 0.108353089 | DEK/ACTR2/BCL2/KDM1A/FUS/DDX39B/SPRED1/TERF2 | 8 |
| BP | GO:0002683 | negative regulation of immune system process | 12/203 | 434/18723 | 0.002845727 | 0.129110229 | 0.110997702 | INHBA/OAS1/LAPTM5/FGL2/TWSG1/LYN/FBN1/PTPN6/LYAR/ADORA1/PRNP/SOCS5 | 12 |
| BP | GO:0030534 | adult behavior | 6/203 | 130/18723 | 0.002957482 | 0.132367288 | 0.113797837 | PCDH17/CCND2/NCSTN/ASIP/CLN8/FOXA2 | 6 |
| BP | GO:0048873 | homeostasis of number of cells within a tissue | 3/203 | 27/18723 | 0.003032116 | 0.13387705 | 0.115095798 | BCL2/RAC3/LIPA | 3 |
| BP | GO:0019079 | viral genome replication | 6/203 | 131/18723 | 0.003072058 | 0.13387705 | 0.115095798 | OAS1/DEK/MX1/BCL2/ATG16L1/IFI27 | 6 |
| BP | GO:0045936 | negative regulation of phosphate metabolic process | 12/203 | 441/18723 | 0.003237509 | 0.139254929 | 0.119719229 | INHBA/PRKAG2/FKBP8/LYN/PTPN6/UBE2B/PRNP/SOCS5/PPP5C/FOXA2/SPRED1/GNAQ | 12 |
| BP | GO:0010563 | negative regulation of phosphorus metabolic process | 12/203 | 442/18723 | 0.003296883 | 0.139411669 | 0.11985398 | INHBA/PRKAG2/FKBP8/LYN/PTPN6/UBE2B/PRNP/SOCS5/PPP5C/FOXA2/SPRED1/GNAQ | 12 |
| BP | GO:0050879 | multicellular organismal movement | 4/203 | 57/18723 | 0.003383724 | 0.139411669 | 0.11985398 | DMPK/GSTO1/SYNM/CLN8 | 4 |
| BP | GO:0050881 | musculoskeletal movement | 4/203 | 57/18723 | 0.003383724 | 0.139411669 | 0.11985398 | DMPK/GSTO1/SYNM/CLN8 | 4 |
| BP | GO:0022898 | regulation of transmembrane transporter activity | 9/203 | 278/18723 | 0.003409525 | 0.139411669 | 0.11985398 | GJA1/BCL2/WNK4/FXYD1/HRC/ATP1B2/PRNP/GSTO1/MINK1 | 9 |
| BP | GO:0034340 | response to type I interferon | 4/203 | 58/18723 | 0.003604005 | 0.144983387 | 0.124644058 | OAS1/MX1/IFI27/PTPN6 | 4 |
| BP | GO:0010955 | negative regulation of protein processing | 3/203 | 29/18723 | 0.003728104 | 0.144983387 | 0.124644058 | IL1R2/CARD16/PRNP | 3 |
| BP | GO:0070198 | protein localization to chromosome, telomeric region | 3/203 | 29/18723 | 0.003728104 | 0.144983387 | 0.124644058 | TCP1/PINX1/TERF2 | 3 |
| BP | GO:1903318 | negative regulation of protein maturation | 3/203 | 29/18723 | 0.003728104 | 0.144983387 | 0.124644058 | IL1R2/CARD16/PRNP | 3 |
| BP | GO:0060401 | cytosolic calcium ion transport | 7/203 | 182/18723 | 0.003764665 | 0.144983387 | 0.124644058 | FGF2/BCL2/HRC/LYN/PTPN6/PRNP/GSTO1 | 7 |
| BP | GO:0007188 | adenylate cyclase-modulating G protein-coupled receptor signaling pathway | 8/203 | 233/18723 | 0.003990428 | 0.151488927 | 0.130236953 | RAMP2/GNG2/GIPR/LPAR1/CRHR2/ADORA1/GNA11/GNAQ | 8 |
| BP | GO:0120162 | positive regulation of cold-induced thermogenesis | 5/203 | 97/18723 | 0.004105204 | 0.151488927 | 0.130236953 | GJA1/KDM1A/UCP2/GADD45G/ADIPOR1 | 5 |
| BP | GO:0050858 | negative regulation of antigen receptor-mediated signaling pathway | 3/203 | 30/18723 | 0.004109585 | 0.151488927 | 0.130236953 | LAPTM5/PTPN6/PRNP | 3 |
| BP | GO:0007369 | gastrulation | 7/203 | 185/18723 | 0.004116547 | 0.151488927 | 0.130236953 | GJA1/INHBA/TWSG1/ETV2/PHLDB2/FOXA2/ITGA2 | 7 |
| BP | GO:0030177 | positive regulation of Wnt signaling pathway | 6/203 | 140/18723 | 0.004257994 | 0.151791027 | 0.130496672 | FGF2/DKK2/WNT10B/RPS12/SOX4/UBE2B | 6 |
| BP | GO:0001933 | negative regulation of protein phosphorylation | 10/203 | 342/18723 | 0.004258208 | 0.151791027 | 0.130496672 | PRKAG2/FKBP8/LYN/PTPN6/UBE2B/PRNP/SOCS5/PPP5C/SPRED1/GNAQ | 10 |
| BP | GO:0030072 | peptide hormone secretion | 8/203 | 236/18723 | 0.004308079 | 0.151791027 | 0.130496672 | GJA1/GIPR/SOX4/UCP2/RAB11B/ICA1/FOXA2/PICK1 | 8 |
| BP | GO:0048762 | mesenchymal cell differentiation | 8/203 | 236/18723 | 0.004308079 | 0.151791027 | 0.130496672 | BCL2/ALDH1A2/WNT2/PHLDB2/ADIPOR1/FOXA2/SPRED1/OVOL2 | 8 |
| BP | GO:1903038 | negative regulation of leukocyte cell-cell adhesion | 6/203 | 141/18723 | 0.004408026 | 0.152552826 | 0.1311516 | LAPTM5/FGL2/TWSG1/PTPN6/PRNP/SOCS5 | 6 |
| BP | GO:0010717 | regulation of epithelial to mesenchymal transition | 5/203 | 99/18723 | 0.004477761 | 0.152552826 | 0.1311516 | PHLDB2/ADIPOR1/FOXA2/SPRED1/OVOL2 | 5 |
| BP | GO:0060291 | long-term synaptic potentiation | 5/203 | 99/18723 | 0.004477761 | 0.152552826 | 0.1311516 | NCSTN/CRHR2/ADORA1/PRNP/NPTN | 5 |
| BP | GO:0001782 | B cell homeostasis | 3/203 | 31/18723 | 0.004513942 | 0.152552826 | 0.1311516 | BCL2/DOCK11/LYN | 3 |
| BP | GO:0097553 | calcium ion transmembrane import into cytosol | 6/203 | 142/18723 | 0.004561925 | 0.152617113 | 0.131206868 | FGF2/HRC/LYN/PTPN6/PRNP/GSTO1 | 6 |
| BP | GO:0009755 | hormone-mediated signaling pathway | 7/203 | 190/18723 | 0.004757733 | 0.155874166 | 0.134006998 | KDM1A/CRHR2/ZBTB7A/ASIP/CALCOCO1/ADIPOR1/PPP5C | 7 |
| BP | GO:0023061 | signal release | 12/203 | 463/18723 | 0.004761754 | 0.155874166 | 0.134006998 | GJA1/INHBA/GIPR/SOX4/UCP2/LYN/RAB11B/ADORA1/PNKD/ICA1/FOXA2/PICK1 | 12 |
| BP | GO:0050854 | regulation of antigen receptor-mediated signaling pathway | 4/203 | 63/18723 | 0.004852286 | 0.155874166 | 0.134006998 | LAPTM5/LYN/PTPN6/PRNP | 4 |
| BP | GO:0010959 | regulation of metal ion transport | 11/203 | 406/18723 | 0.004901013 | 0.155874166 | 0.134006998 | GJA1/BCL2/WNK4/FXYD1/HRC/LYN/PTPN6/ADORA1/ATP1B2/PRNP/GSTO1 | 11 |
| BP | GO:0010644 | cell communication by electrical coupling | 3/203 | 32/18723 | 0.004941561 | 0.155874166 | 0.134006998 | GJA1/HRC/ATP1B2 | 3 |
| BP | GO:0014041 | regulation of neuron maturation | 2/203 | 10/18723 | 0.004971072 | 0.155874166 | 0.134006998 | BCL2/RAC3 | 2 |
| BP | GO:1902106 | negative regulation of leukocyte differentiation | 5/203 | 102/18723 | 0.005080858 | 0.155874166 | 0.134006998 | INHBA/FGL2/LYN/FBN1/SOCS5 | 5 |
| BP | GO:0030858 | positive regulation of epithelial cell differentiation | 4/203 | 64/18723 | 0.005132622 | 0.155874166 | 0.134006998 | FGF2/WNT10B/ETV2/OVOL2 | 4 |
| BP | GO:0045995 | regulation of embryonic development | 4/203 | 64/18723 | 0.005132622 | 0.155874166 | 0.134006998 | WNT2/PHLDB2/CFL1/FOXA2 | 4 |
| BP | GO:0046888 | negative regulation of hormone secretion | 4/203 | 64/18723 | 0.005132622 | 0.155874166 | 0.134006998 | GJA1/INHBA/UCP2/ADORA1 | 4 |
| BP | GO:0007565 | female pregnancy | 7/203 | 193/18723 | 0.00517698 | 0.155874166 | 0.134006998 | RAMP2/GJA1/BCL2/UCP2/STS/BSG/ITGA2 | 7 |
| BP | GO:0048661 | positive regulation of smooth muscle cell proliferation | 5/203 | 104/18723 | 0.005513561 | 0.15936851 | 0.13701113 | GJA1/FGF2/DDX39B/ITGA2/DNMT1 | 5 |
| BP | GO:0050905 | neuromuscular process | 6/203 | 148/18723 | 0.00556981 | 0.15936851 | 0.13701113 | RAC3/DMPK/GSTO1/SYNM/PNKD/CLN8 | 6 |
| BP | GO:0090276 | regulation of peptide hormone secretion | 7/203 | 196/18723 | 0.005623418 | 0.15936851 | 0.13701113 | GJA1/GIPR/SOX4/UCP2/ICA1/FOXA2/PICK1 | 7 |
| BP | GO:0071300 | cellular response to retinoic acid | 4/203 | 66/18723 | 0.005725422 | 0.15936851 | 0.13701113 | WNT10B/ALDH1A2/WNT2/LYN | 4 |
| BP | GO:0001818 | negative regulation of cytokine production | 10/203 | 357/18723 | 0.005726324 | 0.15936851 | 0.13701113 | INHBA/OAS1/LAPTM5/IL1R2/TWSG1/CARD16/PTPN6/PRNP/SOCS5/NPTN | 10 |
| BP | GO:0006356 | regulation of transcription by RNA polymerase I | 3/203 | 34/18723 | 0.005868026 | 0.15936851 | 0.13701113 | DHX33/LYAR/WDR43 | 3 |
| BP | GO:0034383 | low-density lipoprotein particle clearance | 3/203 | 34/18723 | 0.005868026 | 0.15936851 | 0.13701113 | ANXA2/LIPA/SOAT1 | 3 |
| BP | GO:0050869 | negative regulation of B cell activation | 3/203 | 34/18723 | 0.005868026 | 0.15936851 | 0.13701113 | INHBA/LAPTM5/LYN | 3 |
| BP | GO:0098751 | bone cell development | 3/203 | 34/18723 | 0.005868026 | 0.15936851 | 0.13701113 | ANXA2/FBN1/PTPN6 | 3 |
| BP | GO:1903707 | negative regulation of hemopoiesis | 5/203 | 106/18723 | 0.00597167 | 0.15936851 | 0.13701113 | INHBA/FGL2/LYN/FBN1/SOCS5 | 5 |
| BP | GO:0003093 | regulation of glomerular filtration | 2/203 | 11/18723 | 0.006032567 | 0.15936851 | 0.13701113 | GJA1/ADORA1 | 2 |
| BP | GO:0032276 | regulation of gonadotropin secretion | 2/203 | 11/18723 | 0.006032567 | 0.15936851 | 0.13701113 | GJA1/INHBA | 2 |
| BP | GO:0051573 | negative regulation of histone H3-K9 methylation | 2/203 | 11/18723 | 0.006032567 | 0.15936851 | 0.13701113 | KDM1A/DNMT1 | 2 |
| BP | GO:2000644 | regulation of receptor catabolic process | 2/203 | 11/18723 | 0.006032567 | 0.15936851 | 0.13701113 | ANXA2/LAPTM5 | 2 |
| BP | GO:1903317 | regulation of protein maturation | 4/203 | 67/18723 | 0.006038235 | 0.15936851 | 0.13701113 | IL1R2/SOX4/CARD16/PRNP | 4 |
| BP | GO:0006302 | double-strand break repair | 8/203 | 251/18723 | 0.006198386 | 0.15936851 | 0.13701113 | DEK/ACTR2/KDM1A/RBBP8/ZBTB7A/ZSWIM7/FUS/PPP5C | 8 |
| BP | GO:0000018 | regulation of DNA recombination | 5/203 | 107/18723 | 0.00621049 | 0.15936851 | 0.13701113 | ACTR2/KDM1A/UBE2B/FUS/TERF2 | 5 |
| BP | GO:0032526 | response to retinoic acid | 5/203 | 107/18723 | 0.00621049 | 0.15936851 | 0.13701113 | GJA1/WNT10B/ALDH1A2/WNT2/LYN | 5 |
| BP | GO:0032102 | negative regulation of response to external stimulus | 11/203 | 420/18723 | 0.006276865 | 0.15936851 | 0.13701113 | ANXA2/GJA1/FGF2/OAS1/FGL2/CARD16/LYN/PHLDB2/LYAR/ADORA1/SOCS5 | 11 |
| BP | GO:0010765 | positive regulation of sodium ion transport | 3/203 | 35/18723 | 0.006367542 | 0.15936851 | 0.13701113 | WNK4/FXYD1/ATP1B2 | 3 |
| BP | GO:0019068 | virion assembly | 3/203 | 35/18723 | 0.006367542 | 0.15936851 | 0.13701113 | VPS37B/CHMP7/DDX6 | 3 |
| BP | GO:0034405 | response to fluid shear stress | 3/203 | 35/18723 | 0.006367542 | 0.15936851 | 0.13701113 | GJA1/SREBF2/SOCS5 | 3 |
| BP | GO:0051054 | positive regulation of DNA metabolic process | 7/203 | 201/18723 | 0.00643079 | 0.15936851 | 0.13701113 | FGF2/ACTR2/UBE2B/FUS/TCP1/DDX39B/TERF2 | 7 |
| BP | GO:0009743 | response to carbohydrate | 8/203 | 253/18723 | 0.006491628 | 0.15936851 | 0.13701113 | GJA1/GIPR/SOX4/UCP2/LYN/RAB11B/FOXA2/ITGA2 | 8 |
| BP | GO:0006816 | calcium ion transport | 11/203 | 422/18723 | 0.006495999 | 0.15936851 | 0.13701113 | RAMP2/ANXA2/GJA1/FGF2/BCL2/HRC/LYN/TRPM5/PTPN6/PRNP/GSTO1 | 11 |
| BP | GO:0050805 | negative regulation of synaptic transmission | 4/203 | 69/18723 | 0.006697537 | 0.163104736 | 0.140223211 | PCDH17/ADORA1/PNKD/PICK1 | 4 |
| BP | GO:0032409 | regulation of transporter activity | 9/203 | 310/18723 | 0.006869131 | 0.166062506 | 0.142766043 | GJA1/BCL2/WNK4/FXYD1/HRC/ATP1B2/PRNP/GSTO1/MINK1 | 9 |
| BP | GO:0070830 | bicellular tight junction assembly | 4/203 | 70/18723 | 0.00704436 | 0.168833772 | 0.145148536 | RAMP2/GJA1/CLDN11/CLDN7 | 4 |
| BP | GO:0010623 | programmed cell death involved in cell development | 2/203 | 12/18723 | 0.00718767 | 0.168833772 | 0.145148536 | FGF2/BCL2 | 2 |
| BP | GO:0032780 | negative regulation of ATPase activity | 2/203 | 12/18723 | 0.00718767 | 0.168833772 | 0.145148536 | PXK/PAM16 | 2 |
| BP | GO:0046185 | aldehyde catabolic process | 2/203 | 12/18723 | 0.00718767 | 0.168833772 | 0.145148536 | HAGH/PNKD | 2 |
| BP | GO:0008016 | regulation of heart contraction | 7/203 | 206/18723 | 0.007321576 | 0.169609796 | 0.145815693 | GJA1/FXYD1/HRC/ADORA1/ATP1B2/DMPK/GSTO1 | 7 |
| BP | GO:0001837 | epithelial to mesenchymal transition | 6/203 | 157/18723 | 0.007374339 | 0.169609796 | 0.145815693 | WNT2/PHLDB2/ADIPOR1/FOXA2/SPRED1/OVOL2 | 6 |
| BP | GO:0002262 | myeloid cell homeostasis | 6/203 | 157/18723 | 0.007374339 | 0.169609796 | 0.145815693 | INHBA/NCSTN/ETV2/LYN/ZBTB7A/LYAR | 6 |
| BP | GO:0006605 | protein targeting | 9/203 | 314/18723 | 0.00744309 | 0.170010448 | 0.146160139 | LAPTM5/VPS37B/TRAM2/SRP19/SREBF2/ADORA1/PRNP/PAM16/TIMM17B | 9 |
| BP | GO:0055021 | regulation of cardiac muscle tissue growth | 4/203 | 72/18723 | 0.007773153 | 0.176333445 | 0.1515961 | GJA1/FGF2/WNT2/DDX39B | 4 |
| BP | GO:2000279 | negative regulation of DNA biosynthetic process | 3/203 | 38/18723 | 0.008014845 | 0.18057936 | 0.155246367 | GJA1/PINX1/TERF2 | 3 |
| BP | GO:0051209 | release of sequestered calcium ion into cytosol | 5/203 | 115/18723 | 0.008367717 | 0.1849679 | 0.15901925 | FGF2/HRC/LYN/PTPN6/GSTO1 | 5 |
| BP | GO:0097154 | GABAergic neuron differentiation | 2/203 | 13/18723 | 0.008434245 | 0.1849679 | 0.15901925 | INHBA/RAC3 | 2 |
| BP | GO:1900272 | negative regulation of long-term synaptic potentiation | 2/203 | 13/18723 | 0.008434245 | 0.1849679 | 0.15901925 | ADORA1/PRNP | 2 |
| BP | GO:0120192 | tight junction assembly | 4/203 | 74/18723 | 0.008549853 | 0.1849679 | 0.15901925 | RAMP2/GJA1/CLDN11/CLDN7 | 4 |
| BP | GO:0050878 | regulation of body fluid levels | 10/203 | 379/18723 | 0.008563426 | 0.1849679 | 0.15901925 | ANXA2/GJA1/ENTPD2/WNK4/LYN/PTPN6/ADORA1/FOXA2/GNAQ/ITGA2 | 10 |
| BP | GO:0051283 | negative regulation of sequestering of calcium ion | 5/203 | 116/18723 | 0.008669573 | 0.1849679 | 0.15901925 | FGF2/HRC/LYN/PTPN6/GSTO1 | 5 |
| BP | GO:0036293 | response to decreased oxygen levels | 9/203 | 322/18723 | 0.008700441 | 0.1849679 | 0.15901925 | RAMP2/BCL2/CYBB/UCP2/CARD16/UCP3/ADORA1/PICK1/ITGA2 | 9 |
| BP | GO:0051090 | regulation of DNA-binding transcription factor activity | 11/203 | 440/18723 | 0.008749973 | 0.1849679 | 0.15901925 | GLIS2/WNT10B/KDM1A/WNT2/CARD16/DHX33/ZBTB7A/DDR2/TRAF3/PRNP/FOXA2 | 11 |
| BP | GO:0051651 | maintenance of location in cell | 7/203 | 214/18723 | 0.00893267 | 0.1849679 | 0.15901925 | GJA1/FGF2/ATP7B/HRC/LYN/PTPN6/GSTO1 | 7 |
| BP | GO:0007015 | actin filament organization | 11/203 | 442/18723 | 0.009033763 | 0.1849679 | 0.15901925 | ACTR2/BCL2/PFN1/RAC3/LPAR1/PHLDB2/CFL1/RHOB/TPM4/PICK1/CALD1 | 11 |
| BP | GO:0051348 | negative regulation of transferase activity | 8/203 | 268/18723 | 0.009038626 | 0.1849679 | 0.15901925 | PRKAG2/LYN/PTPN6/SOCS5/FOXA2/SPRED1/PINX1/GNAQ | 8 |
| BP | GO:0010863 | positive regulation of phospholipase C activity | 3/203 | 40/18723 | 0.009239655 | 0.1849679 | 0.15901925 | FGF2/LPAR1/GNAQ | 3 |
| BP | GO:0051282 | regulation of sequestering of calcium ion | 5/203 | 118/18723 | 0.009295734 | 0.1849679 | 0.15901925 | FGF2/HRC/LYN/PTPN6/GSTO1 | 5 |
| BP | GO:0140115 | export across plasma membrane | 4/203 | 76/18723 | 0.009375666 | 0.1849679 | 0.15901925 | GJA1/ATP7B/FXYD1/ATP1B2 | 4 |
| BP | GO:0007596 | blood coagulation | 7/203 | 217/18723 | 0.009599267 | 0.1849679 | 0.15901925 | ANXA2/ENTPD2/LYN/PTPN6/FOXA2/GNAQ/ITGA2 | 7 |
| BP | GO:0030111 | regulation of Wnt signaling pathway | 9/203 | 328/18723 | 0.009744741 | 0.1849679 | 0.15901925 | FGF2/DKK2/WNT10B/EMD/RPS12/SOX4/UBE2B/TLE3/GNAQ | 9 |
| BP | GO:1902166 | negative regulation of intrinsic apoptotic signaling pathway in response to DNA damage by p53 class mediator | 2/203 | 14/18723 | 0.009770193 | 0.1849679 | 0.15901925 | BCL2/KDM1A | 2 |
| BP | GO:0031016 | pancreas development | 4/203 | 77/18723 | 0.009807352 | 0.1849679 | 0.15901925 | GIPR/SOX4/ALDH1A2/FOXA2 | 4 |
| BP | GO:0050856 | regulation of T cell receptor signaling pathway | 3/203 | 41/18723 | 0.009890744 | 0.1849679 | 0.15901925 | LAPTM5/PTPN6/PRNP | 3 |
| BP | GO:0055023 | positive regulation of cardiac muscle tissue growth | 3/203 | 41/18723 | 0.009890744 | 0.1849679 | 0.15901925 | FGF2/WNT2/DDX39B | 3 |
| BP | GO:0050863 | regulation of T cell activation | 9/203 | 329/18723 | 0.009927617 | 0.1849679 | 0.15901925 | LAPTM5/FGL2/TWSG1/SOX4/TNFRSF13C/LYN/PTPN6/PRNP/SOCS5 | 9 |
| BP | GO:0010876 | lipid localization | 11/203 | 448/18723 | 0.009928085 | 0.1849679 | 0.15901925 | ANXA2/INHBA/CHKA/PLEKHA8/SOAT1/SREBF2/OSBPL10/SLC10A2/CLN8/ABCA13/CDS2 | 11 |
| BP | GO:0022407 | regulation of cell-cell adhesion | 11/203 | 448/18723 | 0.009928085 | 0.1849679 | 0.15901925 | LAPTM5/FGL2/TWSG1/SOX4/TNFRSF13C/LYN/PTPN6/PRNP/SOCS5/FOXA2/MINK1 | 11 |
| BP | GO:0030218 | erythrocyte differentiation | 5/203 | 120/18723 | 0.009952402 | 0.1849679 | 0.15901925 | INHBA/ETV2/LYN/ZBTB7A/LYAR | 5 |
| BP | GO:0043297 | apical junction assembly | 4/203 | 78/18723 | 0.010251745 | 0.1849679 | 0.15901925 | RAMP2/GJA1/CLDN11/CLDN7 | 4 |
| BP | GO:0061045 | negative regulation of wound healing | 4/203 | 78/18723 | 0.010251745 | 0.1849679 | 0.15901925 | ANXA2/GJA1/FGF2/PHLDB2 | 4 |
| BP | GO:0001704 | formation of primary germ layer | 5/203 | 121/18723 | 0.01029239 | 0.1849679 | 0.15901925 | GJA1/INHBA/TWSG1/ETV2/ITGA2 | 5 |
| BP | GO:0071214 | cellular response to abiotic stimulus | 9/203 | 331/18723 | 0.010301135 | 0.1849679 | 0.15901925 | GJA1/CCND2/KDM1A/TLR7/CARD16/RHOB/RAB11B/GNA11/ITGA2 | 9 |
| BP | GO:0104004 | cellular response to environmental stimulus | 9/203 | 331/18723 | 0.010301135 | 0.1849679 | 0.15901925 | GJA1/CCND2/KDM1A/TLR7/CARD16/RHOB/RAB11B/GNA11/ITGA2 | 9 |
| BP | GO:0044706 | multi-multicellular organism process | 7/203 | 220/18723 | 0.010301566 | 0.1849679 | 0.15901925 | RAMP2/GJA1/BCL2/UCP2/STS/BSG/ITGA2 | 7 |
| BP | GO:0007212 | dopamine receptor signaling pathway | 3/203 | 42/18723 | 0.010567894 | 0.1849679 | 0.15901925 | GNG2/NCSTN/GNA11 | 3 |
| BP | GO:0032689 | negative regulation of interferon-gamma production | 3/203 | 42/18723 | 0.010567894 | 0.1849679 | 0.15901925 | INHBA/LAPTM5/PRNP | 3 |
| BP | GO:0045292 | mRNA cis splicing, via spliceosome | 3/203 | 42/18723 | 0.010567894 | 0.1849679 | 0.15901925 | PSIP1/WBP11/NCBP2 | 3 |
| BP | GO:1900274 | regulation of phospholipase C activity | 3/203 | 42/18723 | 0.010567894 | 0.1849679 | 0.15901925 | FGF2/LPAR1/GNAQ | 3 |
| BP | GO:0051279 | regulation of release of sequestered calcium ion into cytosol | 4/203 | 79/18723 | 0.010708981 | 0.1849679 | 0.15901925 | HRC/LYN/PTPN6/GSTO1 | 4 |
| BP | GO:0060420 | regulation of heart growth | 4/203 | 79/18723 | 0.010708981 | 0.1849679 | 0.15901925 | GJA1/FGF2/WNT2/DDX39B | 4 |
| BP | GO:0007599 | hemostasis | 7/203 | 222/18723 | 0.010790117 | 0.1849679 | 0.15901925 | ANXA2/ENTPD2/LYN/PTPN6/FOXA2/GNAQ/ITGA2 | 7 |
| BP | GO:0050817 | coagulation | 7/203 | 222/18723 | 0.010790117 | 0.1849679 | 0.15901925 | ANXA2/ENTPD2/LYN/PTPN6/FOXA2/GNAQ/ITGA2 | 7 |
| BP | GO:0051048 | negative regulation of secretion | 6/203 | 171/18723 | 0.010969676 | 0.1849679 | 0.15901925 | GJA1/INHBA/WNK4/UCP2/ADORA1/PNKD | 6 |
| BP | GO:0048145 | regulation of fibroblast proliferation | 4/203 | 80/18723 | 0.011179192 | 0.1849679 | 0.15901925 | ANXA2/EMD/WNT2/DDR2 | 4 |
| BP | GO:0051303 | establishment of chromosome localization | 4/203 | 80/18723 | 0.011179192 | 0.1849679 | 0.15901925 | ACTR2/UBE2B/CHMP7/PINX1 | 4 |
| BP | GO:0120193 | tight junction organization | 4/203 | 80/18723 | 0.011179192 | 0.1849679 | 0.15901925 | RAMP2/GJA1/CLDN11/CLDN7 | 4 |
| BP | GO:1901264 | carbohydrate derivative transport | 4/203 | 80/18723 | 0.011179192 | 0.1849679 | 0.15901925 | GJA1/PLEKHA8/ADORA1/G6PC3 | 4 |
| BP | GO:0006089 | lactate metabolic process | 2/203 | 15/18723 | 0.01119345 | 0.1849679 | 0.15901925 | HAGH/PNKD | 2 |
| BP | GO:0006878 | cellular copper ion homeostasis | 2/203 | 15/18723 | 0.01119345 | 0.1849679 | 0.15901925 | ATP7B/PRNP | 2 |
| BP | GO:0032239 | regulation of nucleobase-containing compound transport | 2/203 | 15/18723 | 0.01119345 | 0.1849679 | 0.15901925 | ADORA1/NCBP2 | 2 |
| BP | GO:0035627 | ceramide transport | 2/203 | 15/18723 | 0.01119345 | 0.1849679 | 0.15901925 | PLEKHA8/ABCA13 | 2 |
| BP | GO:0036376 | sodium ion export across plasma membrane | 2/203 | 15/18723 | 0.01119345 | 0.1849679 | 0.15901925 | FXYD1/ATP1B2 | 2 |
| BP | GO:0042182 | ketone catabolic process | 2/203 | 15/18723 | 0.01119345 | 0.1849679 | 0.15901925 | HAGH/PNKD | 2 |
| BP | GO:0070831 | basement membrane assembly | 2/203 | 15/18723 | 0.01119345 | 0.1849679 | 0.15901925 | RAMP2/PHLDB2 | 2 |
| BP | GO:0140374 | antiviral innate immune response | 2/203 | 15/18723 | 0.01119345 | 0.1849679 | 0.15901925 | OAS1/MX1 | 2 |
| BP | GO:1905168 | positive regulation of double-strand break repair via homologous recombination | 2/203 | 15/18723 | 0.01119345 | 0.1849679 | 0.15901925 | ACTR2/FUS | 2 |
| BP | GO:0007219 | Notch signaling pathway | 6/203 | 172/18723 | 0.011266603 | 0.1849679 | 0.15901925 | TRAF7/NCSTN/ETV2/SREBF2/ZBTB7A/TM2D3 | 6 |
| BP | GO:0009268 | response to pH | 3/203 | 43/18723 | 0.01127129 | 0.1849679 | 0.15901925 | GJA1/RAB11B/GNA11 | 3 |
| BP | GO:1903037 | regulation of leukocyte cell-cell adhesion | 9/203 | 336/18723 | 0.011281255 | 0.1849679 | 0.15901925 | LAPTM5/FGL2/TWSG1/SOX4/TNFRSF13C/LYN/PTPN6/PRNP/SOCS5 | 9 |
| BP | GO:0032386 | regulation of intracellular transport | 9/203 | 337/18723 | 0.011485397 | 0.186600147 | 0.160422514 | ANXA2/RINT1/EMD/IFI27/EDEM2/SREBF2/RAB11B/PRNP/NCBP2 | 9 |
| BP | GO:0034284 | response to monosaccharide | 7/203 | 225/18723 | 0.011554243 | 0.186600147 | 0.160422514 | GJA1/GIPR/SOX4/UCP2/RAB11B/FOXA2/ITGA2 | 7 |
| BP | GO:0021700 | developmental maturation | 8/203 | 280/18723 | 0.011563012 | 0.186600147 | 0.160422514 | BCL2/WNT10B/PFN1/KDM1A/ALDH1A2/RAC3/ZBTB7A/PICK1 | 8 |
| BP | GO:0048144 | fibroblast proliferation | 4/203 | 81/18723 | 0.011662509 | 0.186600147 | 0.160422514 | ANXA2/EMD/WNT2/DDR2 | 4 |
| BP | GO:2001021 | negative regulation of response to DNA damage stimulus | 4/203 | 81/18723 | 0.011662509 | 0.186600147 | 0.160422514 | BCL2/KDM1A/DDX39B/TERF2 | 4 |
| BP | GO:0006869 | lipid transport | 10/203 | 398/18723 | 0.011792008 | 0.187121 | 0.160870298 | ANXA2/INHBA/CHKA/PLEKHA8/SOAT1/SREBF2/OSBPL10/SLC10A2/CLN8/ABCA13 | 10 |
| BP | GO:0007584 | response to nutrient | 6/203 | 174/18723 | 0.011877439 | 0.187121 | 0.160870298 | GIPR/CYBB/ALDH1A2/UCP3/FOXA2/ITGA2 | 6 |
| BP | GO:0007568 | aging | 9/203 | 339/18723 | 0.011901976 | 0.187121 | 0.160870298 | FGF2/BCL2/CISD2/UCP2/ZNF277/UCP3/PRNP/CLN8/TERF2 | 9 |
| BP | GO:0031295 | T cell costimulation | 3/203 | 44/18723 | 0.012001099 | 0.187121 | 0.160870298 | TNFRSF13C/LYN/PTPN6 | 3 |
| BP | GO:0050000 | chromosome localization | 4/203 | 82/18723 | 0.012159057 | 0.187121 | 0.160870298 | ACTR2/UBE2B/CHMP7/PINX1 | 4 |
| BP | GO:0035270 | endocrine system development | 5/203 | 127/18723 | 0.01250068 | 0.187121 | 0.160870298 | FGF2/GIPR/SOX4/ALDH1A2/FOXA2 | 5 |
| BP | GO:0071695 | anatomical structure maturation | 7/203 | 229/18723 | 0.012633107 | 0.187121 | 0.160870298 | BCL2/WNT10B/KDM1A/ALDH1A2/RAC3/ZBTB7A/PICK1 | 7 |
| BP | GO:0048678 | response to axon injury | 4/203 | 83/18723 | 0.01266896 | 0.187121 | 0.160870298 | FGF2/BCL2/GIPR/LYN | 4 |
| BP | GO:0050672 | negative regulation of lymphocyte proliferation | 4/203 | 83/18723 | 0.01266896 | 0.187121 | 0.160870298 | TWSG1/LYN/PTPN6/PRNP | 4 |
| BP | GO:0001977 | renal system process involved in regulation of blood volume | 2/203 | 16/18723 | 0.012701985 | 0.187121 | 0.160870298 | GJA1/ADORA1 | 2 |
| BP | GO:0010649 | regulation of cell communication by electrical coupling | 2/203 | 16/18723 | 0.012701985 | 0.187121 | 0.160870298 | GJA1/HRC | 2 |
| BP | GO:0014819 | regulation of skeletal muscle contraction | 2/203 | 16/18723 | 0.012701985 | 0.187121 | 0.160870298 | DMPK/GSTO1 | 2 |
| BP | GO:0032274 | gonadotropin secretion | 2/203 | 16/18723 | 0.012701985 | 0.187121 | 0.160870298 | GJA1/INHBA | 2 |
| BP | GO:0050884 | neuromuscular process controlling posture | 2/203 | 16/18723 | 0.012701985 | 0.187121 | 0.160870298 | PNKD/CLN8 | 2 |
| BP | GO:1902165 | regulation of intrinsic apoptotic signaling pathway in response to DNA damage by p53 class mediator | 2/203 | 16/18723 | 0.012701985 | 0.187121 | 0.160870298 | BCL2/KDM1A | 2 |
| BP | GO:0003009 | skeletal muscle contraction | 3/203 | 45/18723 | 0.012757475 | 0.187121 | 0.160870298 | DMPK/GSTO1/SYNM | 3 |
| BP | GO:0060421 | positive regulation of heart growth | 3/203 | 45/18723 | 0.012757475 | 0.187121 | 0.160870298 | FGF2/WNT2/DDX39B | 3 |
| BP | GO:0030336 | negative regulation of cell migration | 9/203 | 344/18723 | 0.012992836 | 0.187121 | 0.160870298 | GJA1/FGF2/BCL2/PHLDB2/RHOB/ADORA1/ATP1B2/ADIPOR1/SPRED1 | 9 |
| BP | GO:0035265 | organ growth | 6/203 | 178/18723 | 0.013168526 | 0.187121 | 0.160870298 | GJA1/FGF2/BCL2/WNT2/DDR2/DDX39B | 6 |
| BP | GO:0002088 | lens development in camera-type eye | 4/203 | 84/18723 | 0.013192335 | 0.187121 | 0.160870298 | FGF2/WNT2/BIRC7/SPRED1 | 4 |
| BP | GO:0022404 | molting cycle process | 4/203 | 84/18723 | 0.013192335 | 0.187121 | 0.160870298 | INHBA/BCL2/WNT10B/LRIG1 | 4 |
| BP | GO:0022405 | hair cycle process | 4/203 | 84/18723 | 0.013192335 | 0.187121 | 0.160870298 | INHBA/BCL2/WNT10B/LRIG1 | 4 |
| BP | GO:0032945 | negative regulation of mononuclear cell proliferation | 4/203 | 84/18723 | 0.013192335 | 0.187121 | 0.160870298 | TWSG1/LYN/PTPN6/PRNP | 4 |
| BP | GO:0097061 | dendritic spine organization | 4/203 | 84/18723 | 0.013192335 | 0.187121 | 0.160870298 | ACTR2/CFL1/PRNP/PICK1 | 4 |
| BP | GO:0007498 | mesoderm development | 5/203 | 129/18723 | 0.013302837 | 0.187121 | 0.160870298 | GJA1/INHBA/TWSG1/ETV2/ITGA2 | 5 |
| BP | GO:0034101 | erythrocyte homeostasis | 5/203 | 129/18723 | 0.013302837 | 0.187121 | 0.160870298 | INHBA/ETV2/LYN/ZBTB7A/LYAR | 5 |
| BP | GO:0006941 | striated muscle contraction | 6/203 | 179/18723 | 0.013506065 | 0.187121 | 0.160870298 | GJA1/HRC/ADORA1/DMPK/GSTO1/SYNM | 6 |
| BP | GO:0031018 | endocrine pancreas development | 3/203 | 46/18723 | 0.013540555 | 0.187121 | 0.160870298 | GIPR/SOX4/FOXA2 | 3 |
| BP | GO:0031057 | negative regulation of histone modification | 3/203 | 46/18723 | 0.013540555 | 0.187121 | 0.160870298 | KDM1A/UBE2B/DNMT1 | 3 |
| BP | GO:0031294 | lymphocyte costimulation | 3/203 | 46/18723 | 0.013540555 | 0.187121 | 0.160870298 | TNFRSF13C/LYN/PTPN6 | 3 |
| BP | GO:0070482 | response to oxygen levels | 9/203 | 347/18723 | 0.013682113 | 0.187121 | 0.160870298 | RAMP2/BCL2/CYBB/UCP2/CARD16/UCP3/ADORA1/PICK1/ITGA2 | 9 |
| BP | GO:0006282 | regulation of DNA repair | 5/203 | 130/18723 | 0.013716651 | 0.187121 | 0.160870298 | DEK/ACTR2/KDM1A/FUS/TERF2 | 5 |
| BP | GO:0015918 | sterol transport | 5/203 | 130/18723 | 0.013716651 | 0.187121 | 0.160870298 | ANXA2/SOAT1/SREBF2/OSBPL10/ABCA13 | 5 |
| BP | GO:2000779 | regulation of double-strand break repair | 4/203 | 85/18723 | 0.013729301 | 0.187121 | 0.160870298 | DEK/ACTR2/KDM1A/FUS | 4 |
| BP | GO:0071897 | DNA biosynthetic process | 6/203 | 180/18723 | 0.013849615 | 0.187121 | 0.160870298 | GJA1/FGF2/TCP1/DDX39B/PINX1/TERF2 | 6 |
| BP | GO:0006612 | protein targeting to membrane | 5/203 | 131/18723 | 0.014139056 | 0.187121 | 0.160870298 | VPS37B/TRAM2/SRP19/ADORA1/PRNP | 5 |
| BP | GO:0019221 | cytokine-mediated signaling pathway | 11/203 | 472/18723 | 0.014204802 | 0.187121 | 0.160870298 | OAS1/LAPTM5/IL1R2/MX1/IFI27/CARD16/TNFRSF13C/PTPN6/TRAF3/SOCS5/ADIPOR1 | 11 |
| BP | GO:0010470 | regulation of gastrulation | 2/203 | 17/18723 | 0.014293799 | 0.187121 | 0.160870298 | PHLDB2/FOXA2 | 2 |
| BP | GO:0036035 | osteoclast development | 2/203 | 17/18723 | 0.014293799 | 0.187121 | 0.160870298 | ANXA2/FBN1 | 2 |
| BP | GO:0038065 | collagen-activated signaling pathway | 2/203 | 17/18723 | 0.014293799 | 0.187121 | 0.160870298 | DDR2/ITGA2 | 2 |
| BP | GO:0060644 | mammary gland epithelial cell differentiation | 2/203 | 17/18723 | 0.014293799 | 0.187121 | 0.160870298 | FGF2/IRF6 | 2 |
| BP | GO:0060977 | coronary vasculature morphogenesis | 2/203 | 17/18723 | 0.014293799 | 0.187121 | 0.160870298 | FGF2/SPRED1 | 2 |
| BP | GO:0060485 | mesenchyme development | 8/203 | 291/18723 | 0.014303021 | 0.187121 | 0.160870298 | BCL2/ALDH1A2/WNT2/PHLDB2/ADIPOR1/FOXA2/SPRED1/OVOL2 | 8 |
| BP | GO:0006998 | nuclear envelope organization | 3/203 | 47/18723 | 0.014350463 | 0.187121 | 0.160870298 | EMD/CHMP7/DMPK | 3 |
| BP | GO:0014911 | positive regulation of smooth muscle cell migration | 3/203 | 47/18723 | 0.014350463 | 0.187121 | 0.160870298 | BCL2/S100A11/ITGA2 | 3 |
| BP | GO:0016574 | histone ubiquitination | 3/203 | 47/18723 | 0.014350463 | 0.187121 | 0.160870298 | PCGF1/KDM1A/UBE2B | 3 |
| BP | GO:0045911 | positive regulation of DNA recombination | 3/203 | 47/18723 | 0.014350463 | 0.187121 | 0.160870298 | ACTR2/UBE2B/FUS | 3 |
| BP | GO:0031667 | response to nutrient levels | 11/203 | 474/18723 | 0.014615712 | 0.18983231 | 0.163201246 | PRKAG2/BCL2/GIPR/CYBB/ALDH1A2/UCP2/UCP3/SREBF2/FOXA2/PICK1/ITGA2 | 11 |
| BP | GO:0033673 | negative regulation of kinase activity | 7/203 | 237/18723 | 0.015005672 | 0.191986129 | 0.165052911 | PRKAG2/LYN/PTPN6/SOCS5/FOXA2/SPRED1/GNAQ | 7 |
| BP | GO:0010569 | regulation of double-strand break repair via homologous recombination | 3/203 | 48/18723 | 0.015187309 | 0.191986129 | 0.165052911 | ACTR2/KDM1A/FUS | 3 |
| BP | GO:0033628 | regulation of cell adhesion mediated by integrin | 3/203 | 48/18723 | 0.015187309 | 0.191986129 | 0.165052911 | RAC3/LYN/PTPN6 | 3 |
| BP | GO:0042149 | cellular response to glucose starvation | 3/203 | 48/18723 | 0.015187309 | 0.191986129 | 0.165052911 | PRKAG2/BCL2/PICK1 | 3 |
| BP | GO:0042908 | xenobiotic transport | 3/203 | 48/18723 | 0.015187309 | 0.191986129 | 0.165052911 | GJA1/ATP7B/SLC22A1 | 3 |
| BP | GO:0048146 | positive regulation of fibroblast proliferation | 3/203 | 48/18723 | 0.015187309 | 0.191986129 | 0.165052911 | ANXA2/WNT2/DDR2 | 3 |
| BP | GO:1903053 | regulation of extracellular matrix organization | 3/203 | 48/18723 | 0.015187309 | 0.191986129 | 0.165052911 | AEBP1/PHLDB2/DDR2 | 3 |
| BP | GO:0010232 | vascular transport | 4/203 | 88/18723 | 0.015422842 | 0.193934433 | 0.166727893 | GJA1/SLC6A17/ATP1B2/SLC22A1 | 4 |
| BP | GO:0061041 | regulation of wound healing | 5/203 | 134/18723 | 0.015458542 | 0.193934433 | 0.166727893 | ANXA2/GJA1/FGF2/PHLDB2/FOXA2 | 5 |
| BP | GO:0006991 | response to sterol depletion | 2/203 | 18/18723 | 0.015966928 | 0.196168008 | 0.168648125 | LYN/SREBF2 | 2 |
| BP | GO:0055070 | copper ion homeostasis | 2/203 | 18/18723 | 0.015966928 | 0.196168008 | 0.168648125 | ATP7B/PRNP | 2 |
| BP | GO:0060716 | labyrinthine layer blood vessel development | 2/203 | 18/18723 | 0.015966928 | 0.196168008 | 0.168648125 | WNT2/OVOL2 | 2 |
| BP | GO:0061484 | hematopoietic stem cell homeostasis | 2/203 | 18/18723 | 0.015966928 | 0.196168008 | 0.168648125 | GLIS2/SOX4 | 2 |
| BP | GO:0002762 | negative regulation of myeloid leukocyte differentiation | 3/203 | 49/18723 | 0.016051187 | 0.196168008 | 0.168648125 | INHBA/LYN/FBN1 | 3 |
| BP | GO:0008038 | neuron recognition | 3/203 | 49/18723 | 0.016051187 | 0.196168008 | 0.168648125 | IGSF9/BSG/NPTN | 3 |
| BP | GO:0072091 | regulation of stem cell proliferation | 3/203 | 49/18723 | 0.016051187 | 0.196168008 | 0.168648125 | GJA1/KDM1A/OVOL2 | 3 |
| BP | GO:1904062 | regulation of cation transmembrane transport | 9/203 | 357/18723 | 0.016176486 | 0.196972508 | 0.169339764 | WNK4/FXYD1/HRC/LYN/PTPN6/ATP1B2/PRNP/GSTO1/MINK1 | 9 |
| BP | GO:0010720 | positive regulation of cell development | 8/203 | 298/18723 | 0.016276531 | 0.197077058 | 0.169429647 | ACTR2/MAN2A1/BCL2/KDM1A/RAC3/WNT2/LYN/NPTN | 8 |
| BP | GO:0060047 | heart contraction | 7/203 | 241/18723 | 0.01630408 | 0.197077058 | 0.169429647 | GJA1/FXYD1/HRC/ADORA1/ATP1B2/DMPK/GSTO1 | 7 |
| BP | GO:0045638 | negative regulation of myeloid cell differentiation | 4/203 | 90/18723 | 0.016621791 | 0.198741411 | 0.170860513 | INHBA/GABPA/LYN/FBN1 | 4 |
| BP | GO:0070664 | negative regulation of leukocyte proliferation | 4/203 | 90/18723 | 0.016621791 | 0.198741411 | 0.170860513 | TWSG1/LYN/PTPN6/PRNP | 4 |
| BP | GO:1904705 | regulation of vascular associated smooth muscle cell proliferation | 4/203 | 90/18723 | 0.016621791 | 0.198741411 | 0.170860513 | GJA1/FGF2/DDX39B/DNMT1 | 4 |
| BP | GO:2000146 | negative regulation of cell motility | 9/203 | 359/18723 | 0.016712983 | 0.199112953 | 0.171179932 | GJA1/FGF2/BCL2/PHLDB2/RHOB/ADORA1/ATP1B2/ADIPOR1/SPRED1 | 9 |
| BP | GO:0043268 | positive regulation of potassium ion transport | 3/203 | 50/18723 | 0.01694218 | 0.200401781 | 0.172287954 | WNK4/ADORA1/ATP1B2 | 3 |
| BP | GO:0060337 | type I interferon signaling pathway | 3/203 | 50/18723 | 0.01694218 | 0.200401781 | 0.172287954 | OAS1/IFI27/PTPN6 | 3 |
| BP | GO:0042060 | wound healing | 10/203 | 422/18723 | 0.01709712 | 0.200800219 | 0.172630496 | ANXA2/GJA1/FGF2/ENTPD2/LYN/PHLDB2/PTPN6/FOXA2/GNAQ/ITGA2 | 10 |
| BP | GO:0072594 | establishment of protein localization to organelle | 10/203 | 422/18723 | 0.01709712 | 0.200800219 | 0.172630496 | LAPTM5/VPS37B/TRAM2/IPO8/SRP19/SREBF2/TCP1/TMCO6/PAM16/TIMM17B | 10 |
| BP | GO:1990874 | vascular associated smooth muscle cell proliferation | 4/203 | 91/18723 | 0.017242538 | 0.201792528 | 0.173483597 | GJA1/FGF2/DDX39B/DNMT1 | 4 |
| BP | GO:0000724 | double-strand break repair via homologous recombination | 5/203 | 138/18723 | 0.017342458 | 0.202083895 | 0.173734088 | ACTR2/KDM1A/RBBP8/ZSWIM7/FUS | 5 |
| BP | GO:0042110 | T cell activation | 11/203 | 487/18723 | 0.017509359 | 0.202083895 | 0.173734088 | LAPTM5/FGL2/TWSG1/BCL2/SOX4/NCSTN/TNFRSF13C/LYN/PTPN6/PRNP/SOCS5 | 11 |
| BP | GO:0044772 | mitotic cell cycle phase transition | 10/203 | 424/18723 | 0.017607862 | 0.202083895 | 0.173734088 | INHBA/CCND2/RINT1/BCL2/WNT10B/SOX4/RBBP8/PTPN6/CHMP7/PINX1 | 10 |
| BP | GO:0007213 | G protein-coupled acetylcholine receptor signaling pathway | 2/203 | 19/18723 | 0.01771944 | 0.202083895 | 0.173734088 | GNA11/GNAQ | 2 |
| BP | GO:0007603 | phototransduction, visible light | 2/203 | 19/18723 | 0.01771944 | 0.202083895 | 0.173734088 | GNA11/GNAQ | 2 |
| BP | GO:0060043 | regulation of cardiac muscle cell proliferation | 3/203 | 51/18723 | 0.017860356 | 0.202083895 | 0.173734088 | GJA1/FGF2/WNT2 | 3 |
| BP | GO:0065002 | intracellular protein transmembrane transport | 3/203 | 51/18723 | 0.017860356 | 0.202083895 | 0.173734088 | TRAM2/PAM16/TIMM17B | 3 |
| BP | GO:0001708 | cell fate specification | 4/203 | 92/18723 | 0.017877591 | 0.202083895 | 0.173734088 | FGF2/FKBP8/ETV2/FOXA2 | 4 |
| BP | GO:0034502 | protein localization to chromosome | 4/203 | 92/18723 | 0.017877591 | 0.202083895 | 0.173734088 | CHMP7/TCP1/PINX1/TERF2 | 4 |
| BP | GO:1903351 | cellular response to dopamine | 4/203 | 92/18723 | 0.017877591 | 0.202083895 | 0.173734088 | GNG2/NCSTN/GABPA/GNA11 | 4 |
| BP | GO:0031668 | cellular response to extracellular stimulus | 7/203 | 246/18723 | 0.018036764 | 0.20318967 | 0.174684737 | PRKAG2/BCL2/UCP2/LYN/SREBF2/FOXA2/PICK1 | 7 |
| BP | GO:0000725 | recombinational repair | 5/203 | 140/18723 | 0.018339035 | 0.20522258 | 0.176432456 | ACTR2/KDM1A/RBBP8/ZSWIM7/FUS | 5 |
| BP | GO:0034765 | regulation of ion transmembrane transport | 11/203 | 491/18723 | 0.018480463 | 0.20522258 | 0.176432456 | WNK4/CYBB/FXYD1/HRC/LYN/TRPM5/PTPN6/ATP1B2/PRNP/GSTO1/MINK1 | 11 |
| BP | GO:0060993 | kidney morphogenesis | 4/203 | 93/18723 | 0.018527039 | 0.20522258 | 0.176432456 | FGF2/BCL2/WNK4/SOX4 | 4 |
| BP | GO:0106027 | neuron projection organization | 4/203 | 93/18723 | 0.018527039 | 0.20522258 | 0.176432456 | ACTR2/CFL1/PRNP/PICK1 | 4 |
| BP | GO:1903350 | response to dopamine | 4/203 | 93/18723 | 0.018527039 | 0.20522258 | 0.176432456 | GNG2/NCSTN/GABPA/GNA11 | 4 |
| BP | GO:0071357 | cellular response to type I interferon | 3/203 | 52/18723 | 0.018805774 | 0.206562197 | 0.177584142 | OAS1/IFI27/PTPN6 | 3 |
| BP | GO:0030183 | B cell differentiation | 5/203 | 141/18723 | 0.018851204 | 0.206562197 | 0.177584142 | INHBA/BCL2/DOCK11/PTPN6/ZBTB7A | 5 |
| BP | GO:0032355 | response to estradiol | 5/203 | 141/18723 | 0.018851204 | 0.206562197 | 0.177584142 | RAMP2/GJA1/ALDH1A2/RBBP8/ITGA2 | 5 |
| BP | GO:0051271 | negative regulation of cellular component movement | 9/203 | 367/18723 | 0.018990044 | 0.206562197 | 0.177584142 | GJA1/FGF2/BCL2/PHLDB2/RHOB/ADORA1/ATP1B2/ADIPOR1/SPRED1 | 9 |
| BP | GO:0001666 | response to hypoxia | 8/203 | 307/18723 | 0.019094297 | 0.206562197 | 0.177584142 | RAMP2/BCL2/CYBB/UCP2/CARD16/UCP3/ADORA1/ITGA2 | 8 |
| BP | GO:1903035 | negative regulation of response to wounding | 4/203 | 94/18723 | 0.019190966 | 0.206562197 | 0.177584142 | ANXA2/GJA1/FGF2/PHLDB2 | 4 |
| BP | GO:0071692 | protein localization to extracellular region | 9/203 | 368/18723 | 0.019289767 | 0.206562197 | 0.177584142 | GJA1/GIPR/SOX4/UCP2/FBN1/RAB11B/ICA1/FOXA2/PICK1 | 9 |
| BP | GO:0050777 | negative regulation of immune response | 6/203 | 194/18723 | 0.019318181 | 0.206562197 | 0.177584142 | OAS1/FGL2/LYN/PTPN6/LYAR/SOCS5 | 6 |
| BP | GO:0010523 | negative regulation of calcium ion transport into cytosol | 2/203 | 20/18723 | 0.019549434 | 0.206562197 | 0.177584142 | BCL2/GSTO1 | 2 |
| BP | GO:0014047 | glutamate secretion | 2/203 | 20/18723 | 0.019549434 | 0.206562197 | 0.177584142 | GJA1/ADORA1 | 2 |
| BP | GO:0030150 | protein import into mitochondrial matrix | 2/203 | 20/18723 | 0.019549434 | 0.206562197 | 0.177584142 | PAM16/TIMM17B | 2 |
| BP | GO:0032211 | negative regulation of telomere maintenance via telomerase | 2/203 | 20/18723 | 0.019549434 | 0.206562197 | 0.177584142 | PINX1/TERF2 | 2 |
| BP | GO:0032210 | regulation of telomere maintenance via telomerase | 3/203 | 53/18723 | 0.019778476 | 0.206562197 | 0.177584142 | TCP1/PINX1/TERF2 | 3 |
| BP | GO:0033059 | cellular pigmentation | 3/203 | 53/18723 | 0.019778476 | 0.206562197 | 0.177584142 | BCL2/ASIP/RAB11B | 3 |
| BP | GO:0034381 | plasma lipoprotein particle clearance | 3/203 | 53/18723 | 0.019778476 | 0.206562197 | 0.177584142 | ANXA2/LIPA/SOAT1 | 3 |
| BP | GO:0006942 | regulation of striated muscle contraction | 4/203 | 95/18723 | 0.019869455 | 0.206562197 | 0.177584142 | HRC/ADORA1/DMPK/GSTO1 | 4 |
| BP | GO:0032479 | regulation of type I interferon production | 4/203 | 95/18723 | 0.019869455 | 0.206562197 | 0.177584142 | OAS1/TLR7/DHX33/TRAF3 | 4 |
| BP | GO:0032606 | type I interferon production | 4/203 | 95/18723 | 0.019869455 | 0.206562197 | 0.177584142 | OAS1/TLR7/DHX33/TRAF3 | 4 |
| BP | GO:0042982 | amyloid precursor protein metabolic process | 4/203 | 95/18723 | 0.019869455 | 0.206562197 | 0.177584142 | NCSTN/SOAT1/LYN/PRNP | 4 |
| BP | GO:0003015 | heart process | 7/203 | 251/18723 | 0.019895332 | 0.206562197 | 0.177584142 | GJA1/FXYD1/HRC/ADORA1/ATP1B2/DMPK/GSTO1 | 7 |
| BP | GO:0006006 | glucose metabolic process | 6/203 | 196/18723 | 0.020204105 | 0.206911723 | 0.177884634 | OAS1/DCXR/PGM2L1/ADIPOR1/G6PC3/FOXA2 | 6 |
| BP | GO:0022408 | negative regulation of cell-cell adhesion | 6/203 | 196/18723 | 0.020204105 | 0.206911723 | 0.177884634 | LAPTM5/FGL2/TWSG1/PTPN6/PRNP/SOCS5 | 6 |
| BP | GO:0007159 | leukocyte cell-cell adhesion | 9/203 | 371/18723 | 0.02020955 | 0.206911723 | 0.177884634 | LAPTM5/FGL2/TWSG1/SOX4/TNFRSF13C/LYN/PTPN6/PRNP/SOCS5 | 9 |
| BP | GO:0008380 | RNA splicing | 10/203 | 434/18723 | 0.020332374 | 0.206911723 | 0.177884634 | PSIP1/WBP11/KDM1A/SF3B4/ZBTB7A/CLASRP/FUS/DDX39B/U2AF2/NCBP2 | 10 |
| BP | GO:0001890 | placenta development | 5/203 | 144/18723 | 0.020443977 | 0.206911723 | 0.177884634 | GJA1/WNT2/ETV2/BSG/OVOL2 | 5 |
| BP | GO:0055017 | cardiac muscle tissue growth | 4/203 | 96/18723 | 0.020562584 | 0.206911723 | 0.177884634 | GJA1/FGF2/WNT2/DDX39B | 4 |
| BP | GO:0007215 | glutamate receptor signaling pathway | 3/203 | 54/18723 | 0.020778494 | 0.206911723 | 0.177884634 | NCSTN/PRNP/GNAQ | 3 |
| BP | GO:0070839 | metal ion export | 3/203 | 54/18723 | 0.020778494 | 0.206911723 | 0.177884634 | ATP7B/FXYD1/ATP1B2 | 3 |
| BP | GO:2000179 | positive regulation of neural precursor cell proliferation | 3/203 | 54/18723 | 0.020778494 | 0.206911723 | 0.177884634 | FGF2/KDM1A/LYN | 3 |
| BP | GO:0070588 | calcium ion transmembrane transport | 8/203 | 312/18723 | 0.020802493 | 0.206911723 | 0.177884634 | ANXA2/FGF2/HRC/LYN/TRPM5/PTPN6/PRNP/GSTO1 | 8 |
| BP | GO:0010038 | response to metal ion | 9/203 | 373/18723 | 0.020840122 | 0.206911723 | 0.177884634 | ATP7B/BCL2/GIPR/CYBB/NCSTN/BSG/PRNP/FUS/PPP5C | 9 |
| BP | GO:0048732 | gland development | 10/203 | 436/18723 | 0.020912378 | 0.206911723 | 0.177884634 | FGF2/TWSG1/MAN2A1/BCL2/ALDH1A2/WNT2/IRF6/UCP2/DDX39B/ITGA2 | 10 |
| BP | GO:0048167 | regulation of synaptic plasticity | 6/203 | 198/18723 | 0.021117285 | 0.206911723 | 0.177884634 | NCSTN/CRHR2/ADORA1/PRNP/NPTN/PICK1 | 6 |
| BP | GO:0050864 | regulation of B cell activation | 6/203 | 198/18723 | 0.021117285 | 0.206911723 | 0.177884634 | INHBA/LAPTM5/BCL2/TNFRSF13C/LYN/PTPN6 | 6 |
| BP | GO:0010878 | cholesterol storage | 2/203 | 21/18723 | 0.021455041 | 0.206911723 | 0.177884634 | SOAT1/SREBF2 | 2 |
| BP | GO:0033630 | positive regulation of cell adhesion mediated by integrin | 2/203 | 21/18723 | 0.021455041 | 0.206911723 | 0.177884634 | RAC3/PTPN6 | 2 |
| BP | GO:0039702 | viral budding via host ESCRT complex | 2/203 | 21/18723 | 0.021455041 | 0.206911723 | 0.177884634 | VPS37B/CHMP7 | 2 |
| BP | GO:0071498 | cellular response to fluid shear stress | 2/203 | 21/18723 | 0.021455041 | 0.206911723 | 0.177884634 | SREBF2/SOCS5 | 2 |
| BP | GO:0071605 | monocyte chemotactic protein-1 production | 2/203 | 21/18723 | 0.021455041 | 0.206911723 | 0.177884634 | OAS1/SOCS5 | 2 |
| BP | GO:0071637 | regulation of monocyte chemotactic protein-1 production | 2/203 | 21/18723 | 0.021455041 | 0.206911723 | 0.177884634 | OAS1/SOCS5 | 2 |
| BP | GO:0097062 | dendritic spine maintenance | 2/203 | 21/18723 | 0.021455041 | 0.206911723 | 0.177884634 | PRNP/PICK1 | 2 |
| BP | GO:1902254 | negative regulation of intrinsic apoptotic signaling pathway by p53 class mediator | 2/203 | 21/18723 | 0.021455041 | 0.206911723 | 0.177884634 | BCL2/KDM1A | 2 |
| BP | GO:1903429 | regulation of cell maturation | 2/203 | 21/18723 | 0.021455041 | 0.206911723 | 0.177884634 | BCL2/RAC3 | 2 |
| BP | GO:0051924 | regulation of calcium ion transport | 7/203 | 255/18723 | 0.021475626 | 0.206911723 | 0.177884634 | GJA1/BCL2/HRC/LYN/PTPN6/PRNP/GSTO1 | 7 |
| BP | GO:0060249 | anatomical structure homeostasis | 8/203 | 314/18723 | 0.021515282 | 0.206911723 | 0.177884634 | GJA1/OAS1/BCL2/RAC3/LIPA/ADORA1/ATP1B2/CLN8 | 8 |
| BP | GO:0007189 | adenylate cyclase-activating G protein-coupled receptor signaling pathway | 5/203 | 146/18723 | 0.021553305 | 0.206911723 | 0.177884634 | RAMP2/GNG2/GIPR/LPAR1/GNAQ | 5 |
| BP | GO:0006360 | transcription by RNA polymerase I | 3/203 | 55/18723 | 0.021805849 | 0.207043458 | 0.177997888 | DHX33/LYAR/WDR43 | 3 |
| BP | GO:0045620 | negative regulation of lymphocyte differentiation | 3/203 | 55/18723 | 0.021805849 | 0.207043458 | 0.177997888 | INHBA/FGL2/SOCS5 | 3 |
| BP | GO:0090596 | sensory organ morphogenesis | 7/203 | 256/18723 | 0.021883946 | 0.207043458 | 0.177997888 | FGF2/MAN2A1/BCL2/WNT2/FBN1/PRRX1/LRIG1 | 7 |
| BP | GO:1903522 | regulation of blood circulation | 7/203 | 256/18723 | 0.021883946 | 0.207043458 | 0.177997888 | GJA1/FXYD1/HRC/ADORA1/ATP1B2/DMPK/GSTO1 | 7 |
| BP | GO:0043473 | pigmentation | 4/203 | 98/18723 | 0.02199306 | 0.207043458 | 0.177997888 | BCL2/ASIP/RAB11B/GNA11 | 4 |
| BP | GO:0001889 | liver development | 5/203 | 147/18723 | 0.022122383 | 0.207043458 | 0.177997888 | MAN2A1/ALDH1A2/UCP2/DDX39B/ITGA2 | 5 |
| BP | GO:0016331 | morphogenesis of embryonic epithelium | 5/203 | 147/18723 | 0.022122383 | 0.207043458 | 0.177997888 | PFN1/SOX4/ALDH1A2/WNT2/OVOL2 | 5 |
| BP | GO:1903531 | negative regulation of secretion by cell | 5/203 | 147/18723 | 0.022122383 | 0.207043458 | 0.177997888 | GJA1/INHBA/UCP2/ADORA1/PNKD | 5 |
| BP | GO:0033209 | tumor necrosis factor-mediated signaling pathway | 4/203 | 99/18723 | 0.022730546 | 0.207043458 | 0.177997888 | LAPTM5/CARD16/TNFRSF13C/TRAF3 | 4 |
| BP | GO:0010518 | positive regulation of phospholipase activity | 3/203 | 56/18723 | 0.022860551 | 0.207043458 | 0.177997888 | FGF2/LPAR1/GNAQ | 3 |
| BP | GO:0015800 | acidic amino acid transport | 3/203 | 56/18723 | 0.022860551 | 0.207043458 | 0.177997888 | GJA1/ADORA1/CLN8 | 3 |
| BP | GO:0032608 | interferon-beta production | 3/203 | 56/18723 | 0.022860551 | 0.207043458 | 0.177997888 | OAS1/TLR7/TRAF3 | 3 |
| BP | GO:0032648 | regulation of interferon-beta production | 3/203 | 56/18723 | 0.022860551 | 0.207043458 | 0.177997888 | OAS1/TLR7/TRAF3 | 3 |
| BP | GO:0046622 | positive regulation of organ growth | 3/203 | 56/18723 | 0.022860551 | 0.207043458 | 0.177997888 | FGF2/WNT2/DDX39B | 3 |
| BP | GO:0051653 | spindle localization | 3/203 | 56/18723 | 0.022860551 | 0.207043458 | 0.177997888 | GJA1/ACTR2/CFL1 | 3 |
| BP | GO:0032388 | positive regulation of intracellular transport | 6/203 | 202/18723 | 0.02302676 | 0.207043458 | 0.177997888 | ANXA2/EMD/EDEM2/SREBF2/PRNP/NCBP2 | 6 |
| BP | GO:1904951 | positive regulation of establishment of protein localization | 8/203 | 319/18723 | 0.023372764 | 0.207043458 | 0.177997888 | GJA1/EMD/GIPR/SOX4/EDEM2/SREBF2/PRNP/TCP1 | 8 |
| BP | GO:0002053 | positive regulation of mesenchymal cell proliferation | 2/203 | 22/18723 | 0.023434425 | 0.207043458 | 0.177997888 | WNT2/PRRX1 | 2 |
| BP | GO:0002320 | lymphoid progenitor cell differentiation | 2/203 | 22/18723 | 0.023434425 | 0.207043458 | 0.177997888 | BCL2/SOX4 | 2 |
| BP | GO:0006379 | mRNA cleavage | 2/203 | 22/18723 | 0.023434425 | 0.207043458 | 0.177997888 | CPSF3/NCBP2 | 2 |
| BP | GO:0010881 | regulation of cardiac muscle contraction by regulation of the release of sequestered calcium ion | 2/203 | 22/18723 | 0.023434425 | 0.207043458 | 0.177997888 | HRC/GSTO1 | 2 |
| BP | GO:0031061 | negative regulation of histone methylation | 2/203 | 22/18723 | 0.023434425 | 0.207043458 | 0.177997888 | KDM1A/DNMT1 | 2 |
| BP | GO:0032069 | regulation of nuclease activity | 2/203 | 22/18723 | 0.023434425 | 0.207043458 | 0.177997888 | OAS1/TERF2 | 2 |
| BP | GO:0032402 | melanosome transport | 2/203 | 22/18723 | 0.023434425 | 0.207043458 | 0.177997888 | ASIP/RAB11B | 2 |
| BP | GO:0060343 | trabecula formation | 2/203 | 22/18723 | 0.023434425 | 0.207043458 | 0.177997888 | WNT10B/OVOL2 | 2 |
| BP | GO:0060563 | neuroepithelial cell differentiation | 2/203 | 22/18723 | 0.023434425 | 0.207043458 | 0.177997888 | FGF2/SOX4 | 2 |
| BP | GO:0071404 | cellular response to low-density lipoprotein particle stimulus | 2/203 | 22/18723 | 0.023434425 | 0.207043458 | 0.177997888 | SREBF2/SOCS5 | 2 |
| BP | GO:0071467 | cellular response to pH | 2/203 | 22/18723 | 0.023434425 | 0.207043458 | 0.177997888 | RAB11B/GNA11 | 2 |
| BP | GO:0045807 | positive regulation of endocytosis | 4/203 | 100/18723 | 0.023482952 | 0.207043458 | 0.177997888 | ANXA2/PICK1/ABCA13/ITGA2 | 4 |
| BP | GO:0061640 | cytoskeleton-dependent cytokinesis | 4/203 | 100/18723 | 0.023482952 | 0.207043458 | 0.177997888 | ACTR2/RHOB/CHMP7/KLHDC8B | 4 |
| BP | GO:0030099 | myeloid cell differentiation | 9/203 | 381/18723 | 0.023504934 | 0.207043458 | 0.177997888 | ANXA2/INHBA/GABPA/ETV2/LYN/FBN1/PTPN6/ZBTB7A/LYAR | 9 |
| BP | GO:0051091 | positive regulation of DNA-binding transcription factor activity | 7/203 | 260/18723 | 0.023571157 | 0.207076052 | 0.178025909 | WNT10B/KDM1A/WNT2/CARD16/DHX33/ZBTB7A/DDR2 | 7 |
| BP | GO:0000377 | RNA splicing, via transesterification reactions with bulged adenosine as nucleophile | 8/203 | 320/18723 | 0.0237574 | 0.207610837 | 0.17848567 | PSIP1/WBP11/KDM1A/SF3B4/ZBTB7A/DDX39B/U2AF2/NCBP2 | 8 |
| BP | GO:0000398 | mRNA splicing, via spliceosome | 8/203 | 320/18723 | 0.0237574 | 0.207610837 | 0.17848567 | PSIP1/WBP11/KDM1A/SF3B4/ZBTB7A/DDX39B/U2AF2/NCBP2 | 8 |
| BP | GO:0001959 | regulation of cytokine-mediated signaling pathway | 5/203 | 150/18723 | 0.023887927 | 0.207655679 | 0.178524222 | OAS1/LAPTM5/IL1R2/CARD16/PTPN6 | 5 |
| BP | GO:0061008 | hepaticobiliary system development | 5/203 | 150/18723 | 0.023887927 | 0.207655679 | 0.178524222 | MAN2A1/ALDH1A2/UCP2/DDX39B/ITGA2 | 5 |
| BP | GO:0030902 | hindbrain development | 5/203 | 151/18723 | 0.024496051 | 0.211830077 | 0.182113005 | FGF2/BCL2/ALDH1A2/NCSTN/ATP1B2 | 5 |
| BP | GO:0048592 | eye morphogenesis | 5/203 | 151/18723 | 0.024496051 | 0.211830077 | 0.182113005 | FGF2/MAN2A1/BCL2/WNT2/FBN1 | 5 |
| BP | GO:1990542 | mitochondrial transmembrane transport | 4/203 | 102/18723 | 0.025032768 | 0.212616859 | 0.182789412 | UCP2/UCP3/PAM16/TIMM17B | 4 |
| BP | GO:0010559 | regulation of glycoprotein biosynthetic process | 3/203 | 58/18723 | 0.025051975 | 0.212616859 | 0.182789412 | BCL2/NCSTN/SOAT1 | 3 |
| BP | GO:0032481 | positive regulation of type I interferon production | 3/203 | 58/18723 | 0.025051975 | 0.212616859 | 0.182789412 | OAS1/TLR7/DHX33 | 3 |
| BP | GO:0086065 | cell communication involved in cardiac conduction | 3/203 | 58/18723 | 0.025051975 | 0.212616859 | 0.182789412 | GJA1/HRC/ATP1B2 | 3 |
| BP | GO:0016125 | sterol metabolic process | 5/203 | 152/18723 | 0.025114062 | 0.212616859 | 0.182789412 | PRKAG2/LIPA/SOAT1/SREBF2/CLN8 | 5 |
| BP | GO:0021915 | neural tube development | 5/203 | 152/18723 | 0.025114062 | 0.212616859 | 0.182789412 | PFN1/SOX4/ALDH1A2/FKBP8/OVOL2 | 5 |
| BP | GO:0000375 | RNA splicing, via transesterification reactions | 8/203 | 324/18723 | 0.025340528 | 0.212616859 | 0.182789412 | PSIP1/WBP11/KDM1A/SF3B4/ZBTB7A/DDX39B/U2AF2/NCBP2 | 8 |
| BP | GO:0001759 | organ induction | 2/203 | 23/18723 | 0.025485777 | 0.212616859 | 0.182789412 | FGF2/WNT2 | 2 |
| BP | GO:0016338 | calcium-independent cell-cell adhesion via plasma membrane cell-adhesion molecules | 2/203 | 23/18723 | 0.025485777 | 0.212616859 | 0.182789412 | CLDN11/CLDN7 | 2 |
| BP | GO:0032401 | establishment of melanosome localization | 2/203 | 23/18723 | 0.025485777 | 0.212616859 | 0.182789412 | ASIP/RAB11B | 2 |
| BP | GO:0040019 | positive regulation of embryonic development | 2/203 | 23/18723 | 0.025485777 | 0.212616859 | 0.182789412 | CFL1/FOXA2 | 2 |
| BP | GO:0051904 | pigment granule transport | 2/203 | 23/18723 | 0.025485777 | 0.212616859 | 0.182789412 | ASIP/RAB11B | 2 |
| BP | GO:0071514 | genetic imprinting | 2/203 | 23/18723 | 0.025485777 | 0.212616859 | 0.182789412 | ASIP/DIRAS3 | 2 |
| BP | GO:1902410 | mitotic cytokinetic process | 2/203 | 23/18723 | 0.025485777 | 0.212616859 | 0.182789412 | CHMP7/KLHDC8B | 2 |
| BP | GO:0009100 | glycoprotein metabolic process | 9/203 | 387/18723 | 0.025657566 | 0.213512208 | 0.183559154 | MAN2A1/BCL2/NCSTN/EDEM2/SOAT1/CHST15/RPN1/MAN2B1/ST6GAL2 | 9 |
| BP | GO:0060562 | epithelial tube morphogenesis | 8/203 | 325/18723 | 0.025747573 | 0.213724212 | 0.183741417 | FGF2/BCL2/PFN1/WNK4/SOX4/WNT2/RHOB/OVOL2 | 8 |
| BP | GO:0043551 | regulation of phosphatidylinositol 3-kinase activity | 3/203 | 59/18723 | 0.026188661 | 0.216301362 | 0.185957026 | FGF2/LYN/SOCS5 | 3 |
| BP | GO:0071806 | protein transmembrane transport | 3/203 | 59/18723 | 0.026188661 | 0.216301362 | 0.185957026 | TRAM2/PAM16/TIMM17B | 3 |
| BP | GO:0030856 | regulation of epithelial cell differentiation | 5/203 | 154/18723 | 0.02637994 | 0.217339204 | 0.186849271 | FGF2/WNT10B/ETV2/SPRED1/OVOL2 | 5 |
| BP | GO:0002831 | regulation of response to biotic stimulus | 8/203 | 327/18723 | 0.026575338 | 0.218405752 | 0.187766196 | OAS1/FGL2/CARD16/PSPC1/LYN/PTPN6/LYAR/TRAF3 | 8 |
| BP | GO:0060419 | heart growth | 4/203 | 104/18723 | 0.02664296 | 0.218419511 | 0.187778025 | GJA1/FGF2/WNT2/DDX39B | 4 |
| BP | GO:0032412 | regulation of ion transmembrane transporter activity | 7/203 | 267/18723 | 0.026736035 | 0.218500983 | 0.187848067 | WNK4/FXYD1/HRC/ATP1B2/PRNP/GSTO1/MINK1 | 7 |
| BP | GO:0051656 | establishment of organelle localization | 9/203 | 390/18723 | 0.026784843 | 0.218500983 | 0.187848067 | GJA1/ACTR2/LYN/CFL1/UBE2B/ASIP/CHMP7/RAB11B/PINX1 | 9 |
| BP | GO:0040013 | negative regulation of locomotion | 9/203 | 391/18723 | 0.027168274 | 0.218745087 | 0.188057927 | GJA1/FGF2/BCL2/PHLDB2/RHOB/ADORA1/ATP1B2/ADIPOR1/SPRED1 | 9 |
| BP | GO:0031396 | regulation of protein ubiquitination | 6/203 | 210/18723 | 0.027187068 | 0.218745087 | 0.188057927 | LAPTM5/KDM1A/SOX4/BIRC7/U2AF2/PINX1 | 6 |
| BP | GO:0001894 | tissue homeostasis | 7/203 | 268/18723 | 0.027210678 | 0.218745087 | 0.188057927 | GJA1/OAS1/BCL2/RAC3/LIPA/ATP1B2/CLN8 | 7 |
| BP | GO:0050708 | regulation of protein secretion | 7/203 | 268/18723 | 0.027210678 | 0.218745087 | 0.188057927 | GJA1/GIPR/SOX4/UCP2/ICA1/FOXA2/PICK1 | 7 |
| BP | GO:0006081 | cellular aldehyde metabolic process | 3/203 | 60/18723 | 0.027352624 | 0.218745087 | 0.188057927 | ALDH1A2/HAGH/PNKD | 3 |
| BP | GO:0060038 | cardiac muscle cell proliferation | 3/203 | 60/18723 | 0.027352624 | 0.218745087 | 0.188057927 | GJA1/FGF2/WNT2 | 3 |
| BP | GO:0006582 | melanin metabolic process | 2/203 | 24/18723 | 0.027607321 | 0.218745087 | 0.188057927 | BCL2/ASIP | 2 |
| BP | GO:0033032 | regulation of myeloid cell apoptotic process | 2/203 | 24/18723 | 0.027607321 | 0.218745087 | 0.188057927 | BCL2/TCP1 | 2 |
| BP | GO:0048641 | regulation of skeletal muscle tissue development | 2/203 | 24/18723 | 0.027607321 | 0.218745087 | 0.188057927 | BCL2/WNT10B | 2 |
| BP | GO:0051570 | regulation of histone H3-K9 methylation | 2/203 | 24/18723 | 0.027607321 | 0.218745087 | 0.188057927 | KDM1A/DNMT1 | 2 |
| BP | GO:0051905 | establishment of pigment granule localization | 2/203 | 24/18723 | 0.027607321 | 0.218745087 | 0.188057927 | ASIP/RAB11B | 2 |
| BP | GO:0060571 | morphogenesis of an epithelial fold | 2/203 | 24/18723 | 0.027607321 | 0.218745087 | 0.188057927 | WNT2/OVOL2 | 2 |
| BP | GO:0009267 | cellular response to starvation | 5/203 | 156/18723 | 0.027685927 | 0.218748446 | 0.188060814 | PRKAG2/BCL2/UCP2/SREBF2/PICK1 | 5 |
| BP | GO:0046474 | glycerophospholipid biosynthetic process | 6/203 | 211/18723 | 0.027739839 | 0.218748446 | 0.188060814 | CWH43/FGF2/CHKA/PLD1/SOCS5/CDS2 | 6 |
| BP | GO:0006469 | negative regulation of protein kinase activity | 6/203 | 212/18723 | 0.028300002 | 0.221169172 | 0.190141944 | PRKAG2/LYN/PTPN6/SOCS5/SPRED1/GNAQ | 6 |
| BP | GO:0009749 | response to glucose | 6/203 | 212/18723 | 0.028300002 | 0.221169172 | 0.190141944 | GJA1/GIPR/SOX4/UCP2/RAB11B/FOXA2 | 6 |
| BP | GO:0002793 | positive regulation of peptide secretion | 4/203 | 106/18723 | 0.028313928 | 0.221169172 | 0.190141944 | GJA1/GIPR/SOX4/ADORA1 | 4 |
| BP | GO:0046620 | regulation of organ growth | 4/203 | 106/18723 | 0.028313928 | 0.221169172 | 0.190141944 | GJA1/FGF2/WNT2/DDX39B | 4 |
| BP | GO:0030199 | collagen fibril organization | 3/203 | 61/18723 | 0.028543819 | 0.221918143 | 0.190785844 | ANXA2/AEBP1/DDR2 | 3 |
| BP | GO:1904356 | regulation of telomere maintenance via telomere lengthening | 3/203 | 61/18723 | 0.028543819 | 0.221918143 | 0.190785844 | TCP1/PINX1/TERF2 | 3 |
| BP | GO:0042303 | molting cycle | 4/203 | 107/18723 | 0.029172314 | 0.223783873 | 0.192389835 | INHBA/BCL2/WNT10B/LRIG1 | 4 |
| BP | GO:0042633 | hair cycle | 4/203 | 107/18723 | 0.029172314 | 0.223783873 | 0.192389835 | INHBA/BCL2/WNT10B/LRIG1 | 4 |
| BP | GO:0071868 | cellular response to monoamine stimulus | 4/203 | 107/18723 | 0.029172314 | 0.223783873 | 0.192389835 | GNG2/NCSTN/GABPA/GNA11 | 4 |
| BP | GO:0071870 | cellular response to catecholamine stimulus | 4/203 | 107/18723 | 0.029172314 | 0.223783873 | 0.192389835 | GNG2/NCSTN/GABPA/GNA11 | 4 |
| BP | GO:0000082 | G1/S transition of mitotic cell cycle | 6/203 | 214/18723 | 0.029442635 | 0.223783873 | 0.192389835 | INHBA/CCND2/BCL2/SOX4/RBBP8/PTPN6 | 6 |
| BP | GO:0042113 | B cell activation | 8/203 | 334/18723 | 0.029618428 | 0.223783873 | 0.192389835 | INHBA/LAPTM5/BCL2/TNFRSF13C/DOCK11/LYN/PTPN6/ZBTB7A | 8 |
| BP | GO:1903169 | regulation of calcium ion transmembrane transport | 5/203 | 159/18723 | 0.029720868 | 0.223783873 | 0.192389835 | HRC/LYN/PTPN6/PRNP/GSTO1 | 5 |
| BP | GO:0002260 | lymphocyte homeostasis | 3/203 | 62/18723 | 0.029762195 | 0.223783873 | 0.192389835 | BCL2/DOCK11/LYN | 3 |
| BP | GO:0003071 | renal system process involved in regulation of systemic arterial blood pressure | 2/203 | 25/18723 | 0.029797309 | 0.223783873 | 0.192389835 | GJA1/ADORA1 | 2 |
| BP | GO:0003094 | glomerular filtration | 2/203 | 25/18723 | 0.029797309 | 0.223783873 | 0.192389835 | GJA1/ADORA1 | 2 |
| BP | GO:0010560 | positive regulation of glycoprotein biosynthetic process | 2/203 | 25/18723 | 0.029797309 | 0.223783873 | 0.192389835 | NCSTN/SOAT1 | 2 |
| BP | GO:0030318 | melanocyte differentiation | 2/203 | 25/18723 | 0.029797309 | 0.223783873 | 0.192389835 | BCL2/GNA11 | 2 |
| BP | GO:0032400 | melanosome localization | 2/203 | 25/18723 | 0.029797309 | 0.223783873 | 0.192389835 | ASIP/RAB11B | 2 |
| BP | GO:0062149 | detection of stimulus involved in sensory perception of pain | 2/203 | 25/18723 | 0.029797309 | 0.223783873 | 0.192389835 | ADORA1/ITGA2 | 2 |
| BP | GO:1903055 | positive regulation of extracellular matrix organization | 2/203 | 25/18723 | 0.029797309 | 0.223783873 | 0.192389835 | PHLDB2/DDR2 | 2 |
| BP | GO:0031669 | cellular response to nutrient levels | 6/203 | 215/18723 | 0.030025171 | 0.224633 | 0.19311984 | PRKAG2/BCL2/UCP2/SREBF2/FOXA2/PICK1 | 6 |
| BP | GO:0002832 | negative regulation of response to biotic stimulus | 4/203 | 108/18723 | 0.03004602 | 0.224633 | 0.19311984 | OAS1/FGL2/CARD16/LYAR | 4 |
| BP | GO:0043271 | negative regulation of ion transport | 5/203 | 160/18723 | 0.030419599 | 0.226913769 | 0.195080646 | BCL2/WNK4/ADORA1/PXK/GSTO1 | 5 |
| BP | GO:0043266 | regulation of potassium ion transport | 4/203 | 109/18723 | 0.030935083 | 0.230240436 | 0.197940624 | WNK4/ADORA1/ATP1B2/PRNP | 4 |
| BP | GO:0003014 | renal system process | 4/203 | 110/18723 | 0.031839533 | 0.231291783 | 0.198844481 | GJA1/BCL2/WNK4/ADORA1 | 4 |
| BP | GO:0018958 | phenol-containing compound metabolic process | 4/203 | 110/18723 | 0.031839533 | 0.231291783 | 0.198844481 | PNMT/BCL2/ASIP/PNKD | 4 |
| BP | GO:0060759 | regulation of response to cytokine stimulus | 5/203 | 162/18723 | 0.031847914 | 0.231291783 | 0.198844481 | OAS1/LAPTM5/IL1R2/CARD16/PTPN6 | 5 |
| BP | GO:0048545 | response to steroid hormone | 8/203 | 339/18723 | 0.031934016 | 0.231291783 | 0.198844481 | RAMP2/BCL2/KDM1A/CYBB/UCP3/ZBTB7A/CALCOCO1/PPP5C | 8 |
| BP | GO:0006027 | glycosaminoglycan catabolic process | 2/203 | 26/18723 | 0.032054024 | 0.231291783 | 0.198844481 | FGF2/HPSE2 | 2 |
| BP | GO:0006614 | SRP-dependent cotranslational protein targeting to membrane | 2/203 | 26/18723 | 0.032054024 | 0.231291783 | 0.198844481 | TRAM2/SRP19 | 2 |
| BP | GO:0032682 | negative regulation of chemokine production | 2/203 | 26/18723 | 0.032054024 | 0.231291783 | 0.198844481 | OAS1/SOCS5 | 2 |
| BP | GO:0033522 | histone H2A ubiquitination | 2/203 | 26/18723 | 0.032054024 | 0.231291783 | 0.198844481 | PCGF1/UBE2B | 2 |
| BP | GO:0034063 | stress granule assembly | 2/203 | 26/18723 | 0.032054024 | 0.231291783 | 0.198844481 | CSDE1/DDX6 | 2 |
| BP | GO:0046697 | decidualization | 2/203 | 26/18723 | 0.032054024 | 0.231291783 | 0.198844481 | GJA1/BSG | 2 |
| BP | GO:0046755 | viral budding | 2/203 | 26/18723 | 0.032054024 | 0.231291783 | 0.198844481 | VPS37B/CHMP7 | 2 |
| BP | GO:0051875 | pigment granule localization | 2/203 | 26/18723 | 0.032054024 | 0.231291783 | 0.198844481 | ASIP/RAB11B | 2 |
| BP | GO:0060314 | regulation of ryanodine-sensitive calcium-release channel activity | 2/203 | 26/18723 | 0.032054024 | 0.231291783 | 0.198844481 | HRC/GSTO1 | 2 |
| BP | GO:0097205 | renal filtration | 2/203 | 26/18723 | 0.032054024 | 0.231291783 | 0.198844481 | GJA1/ADORA1 | 2 |
| BP | GO:0030888 | regulation of B cell proliferation | 3/203 | 64/18723 | 0.032280235 | 0.231411556 | 0.198947451 | BCL2/TNFRSF13C/LYN | 3 |
| BP | GO:0070542 | response to fatty acid | 3/203 | 64/18723 | 0.032280235 | 0.231411556 | 0.198947451 | GIPR/UCP2/PPP5C | 3 |
| BP | GO:1903018 | regulation of glycoprotein metabolic process | 3/203 | 64/18723 | 0.032280235 | 0.231411556 | 0.198947451 | BCL2/NCSTN/SOAT1 | 3 |
| BP | GO:0009746 | response to hexose | 6/203 | 219/18723 | 0.032430838 | 0.231989061 | 0.199443939 | GJA1/GIPR/SOX4/UCP2/RAB11B/FOXA2 | 6 |
| BP | GO:0010976 | positive regulation of neuron projection development | 5/203 | 163/18723 | 0.032577569 | 0.232226533 | 0.199648097 | ACTR2/KDM1A/LYN/ATP1B2/NPTN | 5 |
| BP | GO:0051051 | negative regulation of transport | 10/203 | 470/18723 | 0.03271351 | 0.232226533 | 0.199648097 | GJA1/INHBA/BCL2/WNK4/UCP2/SREBF2/ADORA1/PXK/GSTO1/PNKD | 10 |
| BP | GO:0071867 | response to monoamine | 4/203 | 111/18723 | 0.032759402 | 0.232226533 | 0.199648097 | GNG2/NCSTN/GABPA/GNA11 | 4 |
| BP | GO:0071869 | response to catecholamine | 4/203 | 111/18723 | 0.032759402 | 0.232226533 | 0.199648097 | GNG2/NCSTN/GABPA/GNA11 | 4 |
| BP | GO:1902105 | regulation of leukocyte differentiation | 7/203 | 279/18723 | 0.032814619 | 0.232226533 | 0.199648097 | INHBA/FGL2/SOX4/LYN/FBN1/PTPN6/SOCS5 | 7 |
| BP | GO:0050806 | positive regulation of synaptic transmission | 5/203 | 164/18723 | 0.033317599 | 0.235283346 | 0.202276077 | NCSTN/CRHR2/ADORA1/PRNP/NPTN | 5 |
| BP | GO:0070613 | regulation of protein processing | 3/203 | 65/18723 | 0.033579749 | 0.235934229 | 0.20283565 | IL1R2/CARD16/PRNP | 3 |
| BP | GO:1905330 | regulation of morphogenesis of an epithelium | 3/203 | 65/18723 | 0.033579749 | 0.235934229 | 0.20283565 | GJA1/FGF2/WNT2 | 3 |
| BP | GO:0032609 | interferon-gamma production | 4/203 | 112/18723 | 0.033694713 | 0.235934229 | 0.20283565 | INHBA/LAPTM5/TLR7/PRNP | 4 |
| BP | GO:0032649 | regulation of interferon-gamma production | 4/203 | 112/18723 | 0.033694713 | 0.235934229 | 0.20283565 | INHBA/LAPTM5/TLR7/PRNP | 4 |
| BP | GO:0000302 | response to reactive oxygen species | 6/203 | 222/18723 | 0.034315215 | 0.2381853 | 0.204770924 | BCL2/UCP2/ZNF277/UCP3/RHOB/PPP5C | 6 |
| BP | GO:0010882 | regulation of cardiac muscle contraction by calcium ion signaling | 2/203 | 27/18723 | 0.034375777 | 0.2381853 | 0.204770924 | HRC/GSTO1 | 2 |
| BP | GO:0032703 | negative regulation of interleukin-2 production | 2/203 | 27/18723 | 0.034375777 | 0.2381853 | 0.204770924 | LAPTM5/PRNP | 2 |
| BP | GO:0032781 | positive regulation of ATPase activity | 2/203 | 27/18723 | 0.034375777 | 0.2381853 | 0.204770924 | PFN1/ATP1B2 | 2 |
| BP | GO:1904357 | negative regulation of telomere maintenance via telomere lengthening | 2/203 | 27/18723 | 0.034375777 | 0.2381853 | 0.204770924 | PINX1/TERF2 | 2 |
| BP | GO:0043112 | receptor metabolic process | 5/203 | 166/18723 | 0.034828916 | 0.240821232 | 0.207037068 | RAMP2/ANXA2/LAPTM5/RAB11B/PICK1 | 5 |
| BP | GO:2000573 | positive regulation of DNA biosynthetic process | 3/203 | 66/18723 | 0.034906146 | 0.240852407 | 0.20706387 | FGF2/TCP1/DDX39B | 3 |
| BP | GO:0015850 | organic hydroxy compound transport | 7/203 | 284/18723 | 0.035599555 | 0.244194894 | 0.209937448 | ANXA2/SOAT1/SREBF2/OSBPL10/SLC10A2/SLC22A1/ABCA13 | 7 |
| BP | GO:1903034 | regulation of response to wounding | 5/203 | 167/18723 | 0.035600262 | 0.244194894 | 0.209937448 | ANXA2/GJA1/FGF2/PHLDB2/FOXA2 | 5 |
| BP | GO:0002244 | hematopoietic progenitor cell differentiation | 4/203 | 114/18723 | 0.035611755 | 0.244194894 | 0.209937448 | INHBA/BCL2/SOX4/PTPN6 | 4 |
| BP | GO:0010517 | regulation of phospholipase activity | 3/203 | 67/18723 | 0.036259329 | 0.244974091 | 0.210607334 | FGF2/LPAR1/GNAQ | 3 |
| BP | GO:0042130 | negative regulation of T cell proliferation | 3/203 | 67/18723 | 0.036259329 | 0.244974091 | 0.210607334 | TWSG1/PTPN6/PRNP | 3 |
| BP | GO:0061180 | mammary gland epithelium development | 3/203 | 67/18723 | 0.036259329 | 0.244974091 | 0.210607334 | FGF2/WNT2/IRF6 | 3 |
| BP | GO:0050670 | regulation of lymphocyte proliferation | 6/203 | 225/18723 | 0.036269102 | 0.244974091 | 0.210607334 | TWSG1/BCL2/TNFRSF13C/LYN/PTPN6/PRNP | 6 |
| BP | GO:0050769 | positive regulation of neurogenesis | 6/203 | 225/18723 | 0.036269102 | 0.244974091 | 0.210607334 | ACTR2/MAN2A1/KDM1A/WNT2/LYN/NPTN | 6 |
| BP | GO:0000303 | response to superoxide | 2/203 | 28/18723 | 0.036760907 | 0.244974091 | 0.210607334 | UCP2/UCP3 | 2 |
| BP | GO:0003156 | regulation of animal organ formation | 2/203 | 28/18723 | 0.036760907 | 0.244974091 | 0.210607334 | FGF2/WNT2 | 2 |
| BP | GO:0010464 | regulation of mesenchymal cell proliferation | 2/203 | 28/18723 | 0.036760907 | 0.244974091 | 0.210607334 | WNT2/PRRX1 | 2 |
| BP | GO:0032801 | receptor catabolic process | 2/203 | 28/18723 | 0.036760907 | 0.244974091 | 0.210607334 | ANXA2/LAPTM5 | 2 |
| BP | GO:0042983 | amyloid precursor protein biosynthetic process | 2/203 | 28/18723 | 0.036760907 | 0.244974091 | 0.210607334 | NCSTN/SOAT1 | 2 |
| BP | GO:0042984 | regulation of amyloid precursor protein biosynthetic process | 2/203 | 28/18723 | 0.036760907 | 0.244974091 | 0.210607334 | NCSTN/SOAT1 | 2 |
| BP | GO:0060765 | regulation of androgen receptor signaling pathway | 2/203 | 28/18723 | 0.036760907 | 0.244974091 | 0.210607334 | KDM1A/ZBTB7A | 2 |
| BP | GO:0070076 | histone lysine demethylation | 2/203 | 28/18723 | 0.036760907 | 0.244974091 | 0.210607334 | KDM1A/UBE2B | 2 |
| BP | GO:1903020 | positive regulation of glycoprotein metabolic process | 2/203 | 28/18723 | 0.036760907 | 0.244974091 | 0.210607334 | NCSTN/SOAT1 | 2 |
| BP | GO:0043434 | response to peptide hormone | 9/203 | 414/18723 | 0.037089154 | 0.246365646 | 0.211803672 | GJA1/CYBB/UCP2/CRHR2/LYN/UCP3/FBN1/BSG/ADIPOR1 | 9 |
| BP | GO:0006937 | regulation of muscle contraction | 5/203 | 169/18723 | 0.037174469 | 0.246365646 | 0.211803672 | HRC/ADORA1/DMPK/GSTO1/ITGA2 | 5 |
| BP | GO:0021782 | glial cell development | 4/203 | 116/18723 | 0.037590806 | 0.246365646 | 0.211803672 | SOX4/NCSTN/LYN/PICK1 | 4 |
| BP | GO:0030518 | intracellular steroid hormone receptor signaling pathway | 4/203 | 116/18723 | 0.037590806 | 0.246365646 | 0.211803672 | KDM1A/ZBTB7A/CALCOCO1/PPP5C | 4 |
| BP | GO:0032944 | regulation of mononuclear cell proliferation | 6/203 | 227/18723 | 0.037610653 | 0.246365646 | 0.211803672 | TWSG1/BCL2/TNFRSF13C/LYN/PTPN6/PRNP | 6 |
| BP | GO:0007585 | respiratory gaseous exchange by respiratory system | 3/203 | 68/18723 | 0.037639196 | 0.246365646 | 0.211803672 | MAN2A1/UCP3/ADORA1 | 3 |
| BP | GO:0042987 | amyloid precursor protein catabolic process | 3/203 | 68/18723 | 0.037639196 | 0.246365646 | 0.211803672 | NCSTN/LYN/PRNP | 3 |
| BP | GO:0046686 | response to cadmium ion | 3/203 | 68/18723 | 0.037639196 | 0.246365646 | 0.211803672 | CYBB/PRNP/PPP5C | 3 |
| BP | GO:1902305 | regulation of sodium ion transmembrane transport | 3/203 | 68/18723 | 0.037639196 | 0.246365646 | 0.211803672 | WNK4/FXYD1/ATP1B2 | 3 |
| BP | GO:0046651 | lymphocyte proliferation | 7/203 | 288/18723 | 0.037937216 | 0.247826547 | 0.213059627 | TWSG1/BCL2/NCSTN/TNFRSF13C/LYN/PTPN6/PRNP | 7 |
| BP | GO:0030301 | cholesterol transport | 4/203 | 117/18723 | 0.038603618 | 0.248290957 | 0.213458886 | ANXA2/SOAT1/SREBF2/ABCA13 | 4 |
| BP | GO:0048469 | cell maturation | 5/203 | 171/18723 | 0.038790867 | 0.248290957 | 0.213458886 | BCL2/KDM1A/RAC3/ZBTB7A/PICK1 | 5 |
| BP | GO:0007004 | telomere maintenance via telomerase | 3/203 | 69/18723 | 0.039045635 | 0.248290957 | 0.213458886 | TCP1/PINX1/TERF2 | 3 |
| BP | GO:0045669 | positive regulation of osteoblast differentiation | 3/203 | 69/18723 | 0.039045635 | 0.248290957 | 0.213458886 | FGF2/WNT10B/DDR2 | 3 |
| BP | GO:0060193 | positive regulation of lipase activity | 3/203 | 69/18723 | 0.039045635 | 0.248290957 | 0.213458886 | FGF2/LPAR1/GNAQ | 3 |
| BP | GO:0031346 | positive regulation of cell projection organization | 8/203 | 353/18723 | 0.039069778 | 0.248290957 | 0.213458886 | ACTR2/PFN1/KDM1A/DOCK11/LYN/ATP1B2/NPTN/ITGA2 | 8 |
| BP | GO:0044403 | biological process involved in symbiotic interaction | 7/203 | 290/18723 | 0.039143075 | 0.248290957 | 0.213458886 | VPS37B/IFI27/CFL1/BSG/TCP1/DDX39B/ITGA2 | 7 |
| BP | GO:0000305 | response to oxygen radical | 2/203 | 29/18723 | 0.039207781 | 0.248290957 | 0.213458886 | UCP2/UCP3 | 2 |
| BP | GO:0003209 | cardiac atrium morphogenesis | 2/203 | 29/18723 | 0.039207781 | 0.248290957 | 0.213458886 | SOX4/WNT2 | 2 |
| BP | GO:0019082 | viral protein processing | 2/203 | 29/18723 | 0.039207781 | 0.248290957 | 0.213458886 | MAN2A1/EDEM2 | 2 |
| BP | GO:0021522 | spinal cord motor neuron differentiation | 2/203 | 29/18723 | 0.039207781 | 0.248290957 | 0.213458886 | SOX4/CLN8 | 2 |
| BP | GO:0033028 | myeloid cell apoptotic process | 2/203 | 29/18723 | 0.039207781 | 0.248290957 | 0.213458886 | BCL2/TCP1 | 2 |
| BP | GO:0048753 | pigment granule organization | 2/203 | 29/18723 | 0.039207781 | 0.248290957 | 0.213458886 | BCL2/ASIP | 2 |
| BP | GO:0095500 | acetylcholine receptor signaling pathway | 2/203 | 29/18723 | 0.039207781 | 0.248290957 | 0.213458886 | GNA11/GNAQ | 2 |
| BP | GO:1902230 | negative regulation of intrinsic apoptotic signaling pathway in response to DNA damage | 2/203 | 29/18723 | 0.039207781 | 0.248290957 | 0.213458886 | BCL2/KDM1A | 2 |
| BP | GO:1902253 | regulation of intrinsic apoptotic signaling pathway by p53 class mediator | 2/203 | 29/18723 | 0.039207781 | 0.248290957 | 0.213458886 | BCL2/KDM1A | 2 |
| BP | GO:0042770 | signal transduction in response to DNA damage | 5/203 | 172/18723 | 0.039614947 | 0.25002108 | 0.214946294 | RINT1/KDM1A/SOX4/DDX39B/SPRED1 | 5 |
| BP | GO:0051101 | regulation of DNA binding | 4/203 | 118/18723 | 0.039631965 | 0.25002108 | 0.214946294 | KDM1A/ZBTB7A/PINX1/ITGA2 | 4 |
| BP | GO:0032943 | mononuclear cell proliferation | 7/203 | 291/18723 | 0.03975533 | 0.250322531 | 0.215205456 | TWSG1/BCL2/NCSTN/TNFRSF13C/LYN/PTPN6/PRNP | 7 |
| BP | GO:0034329 | cell junction assembly | 9/203 | 420/18723 | 0.040038607 | 0.251627832 | 0.21632764 | RAMP2/GJA1/PCDH17/BCL2/CLDN11/PHLDB2/NPTN/ITGA2/CLDN7 | 9 |
| BP | GO:0007178 | transmembrane receptor protein serine/threonine kinase signaling pathway | 8/203 | 355/18723 | 0.04016965 | 0.251973261 | 0.216624609 | INHBA/TWSG1/FKBP8/ETV2/FBN1/ZBTB7A/SPRED1/OVOL2 | 8 |
| BP | GO:0051099 | positive regulation of binding | 5/203 | 173/18723 | 0.040449643 | 0.253249938 | 0.217722185 | RAMP2/ANXA2/KDM1A/PINX1/ITGA2 | 5 |
| BP | GO:0001822 | kidney development | 7/203 | 293/18723 | 0.040998583 | 0.254858395 | 0.219104996 | FGF2/GLIS2/BCL2/WNK4/SOX4/ALDH1A2/FBN1 | 7 |
| BP | GO:0045619 | regulation of lymphocyte differentiation | 5/203 | 174/18723 | 0.041294974 | 0.254858395 | 0.219104996 | INHBA/FGL2/SOX4/PTPN6/SOCS5 | 5 |
| BP | GO:0007176 | regulation of epidermal growth factor-activated receptor activity | 2/203 | 30/18723 | 0.041714795 | 0.254858395 | 0.219104996 | ADORA1/SOCS5 | 2 |
| BP | GO:0007202 | activation of phospholipase C activity | 2/203 | 30/18723 | 0.041714795 | 0.254858395 | 0.219104996 | LPAR1/GNAQ | 2 |
| BP | GO:0010880 | regulation of release of sequestered calcium ion into cytosol by sarcoplasmic reticulum | 2/203 | 30/18723 | 0.041714795 | 0.254858395 | 0.219104996 | HRC/GSTO1 | 2 |
| BP | GO:0036258 | multivesicular body assembly | 2/203 | 30/18723 | 0.041714795 | 0.254858395 | 0.219104996 | VPS37B/CHMP7 | 2 |
| BP | GO:0044788 | modulation by host of viral process | 2/203 | 30/18723 | 0.041714795 | 0.254858395 | 0.219104996 | IFI27/CFL1 | 2 |
| BP | GO:0045577 | regulation of B cell differentiation | 2/203 | 30/18723 | 0.041714795 | 0.254858395 | 0.219104996 | INHBA/PTPN6 | 2 |
| BP | GO:0046825 | regulation of protein export from nucleus | 2/203 | 30/18723 | 0.041714795 | 0.254858395 | 0.219104996 | EMD/IFI27 | 2 |
| BP | GO:0060292 | long-term synaptic depression | 2/203 | 30/18723 | 0.041714795 | 0.254858395 | 0.219104996 | ADORA1/PICK1 | 2 |
| BP | GO:0060674 | placenta blood vessel development | 2/203 | 30/18723 | 0.041714795 | 0.254858395 | 0.219104996 | WNT2/OVOL2 | 2 |
| BP | GO:2000648 | positive regulation of stem cell proliferation | 2/203 | 30/18723 | 0.041714795 | 0.254858395 | 0.219104996 | GJA1/KDM1A | 2 |
| BP | GO:0000281 | mitotic cytokinesis | 3/203 | 71/18723 | 0.041937749 | 0.254858395 | 0.219104996 | RHOB/CHMP7/KLHDC8B | 3 |
| BP | GO:0008344 | adult locomotory behavior | 3/203 | 71/18723 | 0.041937749 | 0.254858395 | 0.219104996 | CCND2/CLN8/FOXA2 | 3 |
| BP | GO:0043550 | regulation of lipid kinase activity | 3/203 | 71/18723 | 0.041937749 | 0.254858395 | 0.219104996 | FGF2/LYN/SOCS5 | 3 |
| BP | GO:0072078 | nephron tubule morphogenesis | 3/203 | 71/18723 | 0.041937749 | 0.254858395 | 0.219104996 | FGF2/BCL2/WNK4 | 3 |
| BP | GO:0048608 | reproductive structure development | 9/203 | 424/18723 | 0.042091243 | 0.255322706 | 0.21950417 | GJA1/INHBA/BCL2/WNT2/ETV2/CSDE1/PTPN6/BSG/OVOL2 | 9 |
| BP | GO:0009306 | protein secretion | 8/203 | 359/18723 | 0.042431077 | 0.256913578 | 0.220871862 | GJA1/GIPR/SOX4/UCP2/RAB11B/ICA1/FOXA2/PICK1 | 8 |
| BP | GO:0002224 | toll-like receptor signaling pathway | 4/203 | 121/18723 | 0.042810252 | 0.258265125 | 0.222033805 | OAS1/TLR7/LYN/TRAF3 | 4 |
| BP | GO:0042752 | regulation of circadian rhythm | 4/203 | 121/18723 | 0.042810252 | 0.258265125 | 0.222033805 | PSPC1/ADORA1/GNA11/GNAQ | 4 |
| BP | GO:0050890 | cognition | 7/203 | 296/18723 | 0.042910592 | 0.258399782 | 0.222149571 | CCND2/ACTR2/NCSTN/ADORA1/PRNP/NPTN/CLN8 | 7 |
| BP | GO:0035592 | establishment of protein localization to extracellular region | 8/203 | 360/18723 | 0.043009373 | 0.258524577 | 0.222256859 | GJA1/GIPR/SOX4/UCP2/RAB11B/ICA1/FOXA2/PICK1 | 8 |
| BP | GO:1903131 | mononuclear cell differentiation | 9/203 | 426/18723 | 0.04314378 | 0.258862682 | 0.222547532 | INHBA/FGL2/BCL2/SOX4/DOCK11/LYN/PTPN6/ZBTB7A/SOCS5 | 9 |
| BP | GO:0030330 | DNA damage response, signal transduction by p53 class mediator | 3/203 | 72/18723 | 0.043423166 | 0.259110581 | 0.222760654 | KDM1A/SOX4/SPRED1 | 3 |
| BP | GO:0071479 | cellular response to ionizing radiation | 3/203 | 72/18723 | 0.043423166 | 0.259110581 | 0.222760654 | CCND2/KDM1A/RHOB | 3 |
| BP | GO:0061458 | reproductive system development | 9/203 | 427/18723 | 0.043676648 | 0.259110581 | 0.222760654 | GJA1/INHBA/BCL2/WNT2/ETV2/CSDE1/PTPN6/BSG/OVOL2 | 9 |
| BP | GO:0030324 | lung development | 5/203 | 177/18723 | 0.043894963 | 0.259110581 | 0.222760654 | FGF2/MAN2A1/ALDH1A2/WNT2/LIPA | 5 |
| BP | GO:0006613 | cotranslational protein targeting to membrane | 2/203 | 31/18723 | 0.044280371 | 0.259110581 | 0.222760654 | TRAM2/SRP19 | 2 |
| BP | GO:0016577 | histone demethylation | 2/203 | 31/18723 | 0.044280371 | 0.259110581 | 0.222760654 | KDM1A/UBE2B | 2 |
| BP | GO:0036257 | multivesicular body organization | 2/203 | 31/18723 | 0.044280371 | 0.259110581 | 0.222760654 | VPS37B/CHMP7 | 2 |
| BP | GO:0048566 | embryonic digestive tract development | 2/203 | 31/18723 | 0.044280371 | 0.259110581 | 0.222760654 | ALDH1A2/OVOL2 | 2 |
| BP | GO:0051569 | regulation of histone H3-K4 methylation | 2/203 | 31/18723 | 0.044280371 | 0.259110581 | 0.222760654 | KDM1A/DNMT1 | 2 |
| BP | GO:0060045 | positive regulation of cardiac muscle cell proliferation | 2/203 | 31/18723 | 0.044280371 | 0.259110581 | 0.222760654 | FGF2/WNT2 | 2 |
| BP | GO:0071711 | basement membrane organization | 2/203 | 31/18723 | 0.044280371 | 0.259110581 | 0.222760654 | RAMP2/PHLDB2 | 2 |
| BP | GO:1901797 | negative regulation of signal transduction by p53 class mediator | 2/203 | 31/18723 | 0.044280371 | 0.259110581 | 0.222760654 | BCL2/KDM1A | 2 |
| BP | GO:1905144 | response to acetylcholine | 2/203 | 31/18723 | 0.044280371 | 0.259110581 | 0.222760654 | GNA11/GNAQ | 2 |
| BP | GO:1905145 | cellular response to acetylcholine | 2/203 | 31/18723 | 0.044280371 | 0.259110581 | 0.222760654 | GNA11/GNAQ | 2 |
| BP | GO:0009266 | response to temperature stimulus | 5/203 | 178/18723 | 0.04478301 | 0.260636654 | 0.224072638 | PSIP1/UCP2/LYN/UCP3/ADORA1 | 5 |
| BP | GO:0035725 | sodium ion transmembrane transport | 5/203 | 178/18723 | 0.04478301 | 0.260636654 | 0.224072638 | SLC6A17/WNK4/FXYD1/TRPM5/ATP1B2 | 5 |
| BP | GO:1901990 | regulation of mitotic cell cycle phase transition | 7/203 | 299/18723 | 0.044879558 | 0.260636654 | 0.224072638 | CCND2/RINT1/BCL2/WNT10B/SOX4/PTPN6/PINX1 | 7 |
| BP | GO:0035773 | insulin secretion involved in cellular response to glucose stimulus | 3/203 | 73/18723 | 0.04493464 | 0.260636654 | 0.224072638 | UCP2/RAB11B/FOXA2 | 3 |
| BP | GO:0072088 | nephron epithelium morphogenesis | 3/203 | 73/18723 | 0.04493464 | 0.260636654 | 0.224072638 | FGF2/BCL2/WNK4 | 3 |
| BP | GO:0009132 | nucleoside diphosphate metabolic process | 4/203 | 124/18723 | 0.04612836 | 0.26692846 | 0.229481784 | PRKAG2/ENTPD2/AK7/ZBTB7A | 4 |
| BP | GO:0033143 | regulation of intracellular steroid hormone receptor signaling pathway | 3/203 | 74/18723 | 0.046472026 | 0.26692846 | 0.229481784 | KDM1A/ZBTB7A/PPP5C | 3 |
| BP | GO:0070972 | protein localization to endoplasmic reticulum | 3/203 | 74/18723 | 0.046472026 | 0.26692846 | 0.229481784 | GJA1/TRAM2/SRP19 | 3 |
| BP | GO:0007033 | vacuole organization | 5/203 | 180/18723 | 0.046591263 | 0.26692846 | 0.229481784 | ANXA2/LAPTM5/MAN2A1/ATG16L1/CLN8 | 5 |
| BP | GO:0048660 | regulation of smooth muscle cell proliferation | 5/203 | 180/18723 | 0.046591263 | 0.26692846 | 0.229481784 | GJA1/FGF2/DDX39B/ITGA2/DNMT1 | 5 |
| BP | GO:0006026 | aminoglycan catabolic process | 2/203 | 32/18723 | 0.046902958 | 0.26692846 | 0.229481784 | FGF2/HPSE2 | 2 |
| BP | GO:0050685 | positive regulation of mRNA processing | 2/203 | 32/18723 | 0.046902958 | 0.26692846 | 0.229481784 | SF3B4/NCBP2 | 2 |
| BP | GO:0051497 | negative regulation of stress fiber assembly | 2/203 | 32/18723 | 0.046902958 | 0.26692846 | 0.229481784 | PFN1/PHLDB2 | 2 |
| BP | GO:1900745 | positive regulation of p38MAPK cascade | 2/203 | 32/18723 | 0.046902958 | 0.26692846 | 0.229481784 | GADD45G/MINK1 | 2 |
| BP | GO:2000515 | negative regulation of CD4-positive, alpha-beta T cell activation | 2/203 | 32/18723 | 0.046902958 | 0.26692846 | 0.229481784 | TWSG1/SOCS5 | 2 |
| BP | GO:0072001 | renal system development | 7/203 | 302/18723 | 0.046905907 | 0.26692846 | 0.229481784 | FGF2/GLIS2/BCL2/WNK4/SOX4/ALDH1A2/FBN1 | 7 |
| BP | GO:0001701 | in utero embryonic development | 8/203 | 367/18723 | 0.04720395 | 0.267595055 | 0.230054864 | MAN2A1/WNT2/RBBP8/GABPA/ETV2/UBE2B/TERF2/OVOL2 | 8 |
| BP | GO:1903706 | regulation of hemopoiesis | 8/203 | 367/18723 | 0.04720395 | 0.267595055 | 0.230054864 | INHBA/FGL2/SOX4/GABPA/LYN/FBN1/PTPN6/SOCS5 | 8 |
| BP | GO:0051053 | negative regulation of DNA metabolic process | 4/203 | 125/18723 | 0.047265431 | 0.267595055 | 0.230054864 | GJA1/PAM16/PINX1/TERF2 | 4 |
| BP | GO:0030323 | respiratory tube development | 5/203 | 181/18723 | 0.047511492 | 0.267626336 | 0.230081757 | FGF2/MAN2A1/ALDH1A2/WNT2/LIPA | 5 |
| BP | GO:0042391 | regulation of membrane potential | 9/203 | 434/18723 | 0.047531036 | 0.267626336 | 0.230081757 | GJA1/BCL2/FXYD1/UCP2/ADORA1/ATP1B2/PXK/GNA11/GNAQ | 9 |
| BP | GO:0007162 | negative regulation of cell adhesion | 7/203 | 303/18723 | 0.047594176 | 0.267626336 | 0.230081757 | LAPTM5/FGL2/TWSG1/PHLDB2/PTPN6/PRNP/SOCS5 | 7 |
| BP | GO:0051222 | positive regulation of protein transport | 7/203 | 303/18723 | 0.047594176 | 0.267626336 | 0.230081757 | GJA1/EMD/GIPR/SOX4/EDEM2/SREBF2/PRNP | 7 |
| BP | GO:0006813 | potassium ion transport | 6/203 | 241/18723 | 0.047889649 | 0.268284124 | 0.230647265 | WNK4/FXYD1/TRPM5/ADORA1/ATP1B2/PRNP | 6 |
| BP | GO:0044843 | cell cycle G1/S phase transition | 6/203 | 241/18723 | 0.047889649 | 0.268284124 | 0.230647265 | INHBA/CCND2/BCL2/SOX4/RBBP8/PTPN6 | 6 |
| BP | GO:0006278 | RNA-dependent DNA biosynthetic process | 3/203 | 75/18723 | 0.048035171 | 0.268284124 | 0.230647265 | TCP1/PINX1/TERF2 | 3 |
| BP | GO:0061333 | renal tubule morphogenesis | 3/203 | 75/18723 | 0.048035171 | 0.268284124 | 0.230647265 | FGF2/BCL2/WNK4 | 3 |
| BP | GO:0090287 | regulation of cellular response to growth factor stimulus | 7/203 | 304/18723 | 0.048288879 | 0.269247081 | 0.231475131 | FGF2/TWSG1/FKBP8/FBN1/ZBTB7A/NPTN/SPRED1 | 7 |
| BP | GO:1903320 | regulation of protein modification by small protein conjugation or removal | 6/203 | 242/18723 | 0.048684113 | 0.270994591 | 0.232977488 | LAPTM5/KDM1A/SOX4/BIRC7/U2AF2/PINX1 | 6 |
| BP | GO:0006310 | DNA recombination | 7/203 | 305/18723 | 0.048990027 | 0.27116732 | 0.233125985 | ACTR2/KDM1A/RBBP8/UBE2B/ZSWIM7/FUS/TERF2 | 7 |
| BP | GO:0045785 | positive regulation of cell adhesion | 9/203 | 437/18723 | 0.049250142 | 0.27116732 | 0.233125985 | EDIL3/SOX4/RAC3/TNFRSF13C/LYN/PTPN6/SOCS5/FOXA2/ITGA2 | 9 |
| BP | GO:0001881 | receptor recycling | 2/203 | 33/18723 | 0.049581033 | 0.27116732 | 0.233125985 | ANXA2/RAB11B | 2 |
| BP | GO:0006482 | protein demethylation | 2/203 | 33/18723 | 0.049581033 | 0.27116732 | 0.233125985 | KDM1A/UBE2B | 2 |
| BP | GO:0008214 | protein dealkylation | 2/203 | 33/18723 | 0.049581033 | 0.27116732 | 0.233125985 | KDM1A/UBE2B | 2 |
| BP | GO:0043552 | positive regulation of phosphatidylinositol 3-kinase activity | 2/203 | 33/18723 | 0.049581033 | 0.27116732 | 0.233125985 | FGF2/LYN | 2 |
| BP | GO:0071763 | nuclear membrane organization | 2/203 | 33/18723 | 0.049581033 | 0.27116732 | 0.233125985 | EMD/CHMP7 | 2 |
| BP | GO:0110110 | positive regulation of animal organ morphogenesis | 2/203 | 33/18723 | 0.049581033 | 0.27116732 | 0.233125985 | FGF2/WNT2 | 2 |
| BP | GO:0048565 | digestive tract development | 4/203 | 127/18723 | 0.049586039 | 0.27116732 | 0.233125985 | BCL2/ALDH1A2/PYY/OVOL2 | 4 |
| BP | GO:0014855 | striated muscle cell proliferation | 3/203 | 76/18723 | 0.049623918 | 0.27116732 | 0.233125985 | GJA1/FGF2/WNT2 | 3 |
| BP | GO:0072028 | nephron morphogenesis | 3/203 | 76/18723 | 0.049623918 | 0.27116732 | 0.233125985 | FGF2/BCL2/WNK4 | 3 |
| BP | GO:0006650 | glycerophospholipid metabolic process | 7/203 | 306/18723 | 0.049697634 | 0.27116732 | 0.233125985 | CWH43/FGF2/CHKA/PLD1/OSBPL10/SOCS5/CDS2 | 7 |
| CC | GO:0005834 | heterotrimeric G-protein complex | 4/204 | 34/19550 | 0.000417736 | 0.074983696 | 0.066398112 | GNG2/GNA11/GNG5/GNAQ | 4 |
| CC | GO:1905360 | GTPase complex | 4/204 | 34/19550 | 0.000417736 | 0.074983696 | 0.066398112 | GNG2/GNA11/GNG5/GNAQ | 4 |
| CC | GO:0005925 | focal adhesion | 12/204 | 418/19550 | 0.001527165 | 0.113438616 | 0.100449969 | GJA1/ACTR2/PFN1/NCSTN/PHLDB2/CFL1/RHOB/DDR2/TPM4/IRF2/BSG/ITGA2 | 12 |
| CC | GO:0019898 | extrinsic component of membrane | 10/204 | 309/19550 | 0.001564603 | 0.113438616 | 0.100449969 | ANXA2/GNG2/WNT2/LYN/PRNP/SOCS5/PAM16/GNA11/GNG5/GNAQ | 10 |
| CC | GO:0030055 | cell-substrate junction | 12/204 | 425/19550 | 0.001754586 | 0.113438616 | 0.100449969 | GJA1/ACTR2/PFN1/NCSTN/PHLDB2/CFL1/RHOB/DDR2/TPM4/IRF2/BSG/ITGA2 | 12 |
| CC | GO:0019897 | extrinsic component of plasma membrane | 7/204 | 174/19550 | 0.002378813 | 0.113438616 | 0.100449969 | ANXA2/GNG2/WNT2/LYN/GNA11/GNG5/GNAQ | 7 |
| CC | GO:0005774 | vacuolar membrane | 12/204 | 444/19550 | 0.002515838 | 0.113438616 | 0.100449969 | ANXA2/LAPTM5/ATG16L1/TLR7/NCSTN/PLD1/LYN/MAN2B1/GNA11/TRIM23/ABCA13/GNAQ | 12 |
| CC | GO:0045178 | basal part of cell | 9/204 | 276/19550 | 0.00252788 | 0.113438616 | 0.100449969 | ANXA2/ATP7B/CLDN11/PHLDB2/ADORA1/BSG/SLC22A1/ITGA2/CLDN7 | 9 |
| CC | GO:0005635 | nuclear envelope | 12/204 | 468/19550 | 0.00384224 | 0.135541381 | 0.120021982 | CCND2/MX1/BCL2/EMD/IFI27/CYBB/IPO8/CHMP7/PRICKLE2/DMPK/PRNP/GNAQ | 12 |
| CC | GO:0031965 | nuclear membrane | 9/204 | 297/19550 | 0.004099706 | 0.135541381 | 0.120021982 | CCND2/MX1/BCL2/EMD/IFI27/PRICKLE2/DMPK/PRNP/GNAQ | 9 |
| CC | GO:0031234 | extrinsic component of cytoplasmic side of plasma membrane | 5/204 | 101/19550 | 0.004153079 | 0.135541381 | 0.120021982 | GNG2/LYN/GNA11/GNG5/GNAQ | 5 |
| CC | GO:0099056 | integral component of presynaptic membrane | 4/204 | 66/19550 | 0.005009588 | 0.138763334 | 0.122875024 | PCDH17/NCSTN/ADORA1/NPTN | 4 |
| CC | GO:0005938 | cell cortex | 9/204 | 308/19550 | 0.005183277 | 0.138763334 | 0.122875024 | ANXA2/ACTR2/EMD/PFN1/RAC3/PHLDB2/RHOB/TPM4/CALD1 | 9 |
| CC | GO:0005766 | primary lysosome | 6/204 | 155/19550 | 0.005797911 | 0.138763334 | 0.122875024 | ANXA2/ACTR2/NCSTN/RNASE2/MAN2B1/ABCA13 | 6 |
| CC | GO:0042582 | azurophil granule | 6/204 | 155/19550 | 0.005797911 | 0.138763334 | 0.122875024 | ANXA2/ACTR2/NCSTN/RNASE2/MAN2B1/ABCA13 | 6 |
| CC | GO:0005890 | sodium:potassium-exchanging ATPase complex | 2/204 | 12/19550 | 0.006675588 | 0.149783496 | 0.132633384 | FXYD1/ATP1B2 | 2 |
| CC | GO:0000792 | heterochromatin | 4/204 | 73/19550 | 0.007151151 | 0.151015475 | 0.133724303 | UBE2B/DDX6/TCP1/DNMT1 | 4 |
| CC | GO:0098889 | intrinsic component of presynaptic membrane | 4/204 | 75/19550 | 0.007858419 | 0.154408682 | 0.136728989 | PCDH17/NCSTN/ADORA1/NPTN | 4 |
| CC | GO:0005765 | lysosomal membrane | 10/204 | 395/19550 | 0.008755347 | 0.154408682 | 0.136728989 | ANXA2/LAPTM5/TLR7/NCSTN/PLD1/LYN/GNA11/TRIM23/ABCA13/GNAQ | 10 |
| CC | GO:0098852 | lytic vacuole membrane | 10/204 | 395/19550 | 0.008755347 | 0.154408682 | 0.136728989 | ANXA2/LAPTM5/TLR7/NCSTN/PLD1/LYN/GNA11/TRIM23/ABCA13/GNAQ | 10 |
| CC | GO:0005744 | TIM23 mitochondrial import inner membrane translocase complex | 2/204 | 14/19550 | 0.009078944 | 0.154408682 | 0.136728989 | PAM16/TIMM17B | 2 |
| CC | GO:0009898 | cytoplasmic side of plasma membrane | 6/204 | 172/19550 | 0.00946237 | 0.154408682 | 0.136728989 | GNG2/LYN/TRAF3/GNA11/GNG5/GNAQ | 6 |
| CC | GO:0060077 | inhibitory synapse | 2/204 | 17/19550 | 0.013293047 | 0.202133425 | 0.178989281 | IGSF9/NPTN | 2 |
| CC | GO:0090533 | cation-transporting ATPase complex | 2/204 | 18/19550 | 0.01485295 | 0.202133425 | 0.178989281 | FXYD1/ATP1B2 | 2 |
| CC | GO:0005911 | cell-cell junction | 11/204 | 494/19550 | 0.014941414 | 0.202133425 | 0.178989281 | ANXA2/GJA1/WNK4/FXYD1/LYN/CLDN11/PTPN6/DDX6/S100A11/SYNM/CLDN7 | 11 |
| CC | GO:0042383 | sarcolemma | 5/204 | 138/19550 | 0.014950775 | 0.202133425 | 0.178989281 | ANXA2/FXYD1/NCSTN/BSG/SYNM | 5 |
| CC | GO:0035578 | azurophil granule lumen | 4/204 | 91/19550 | 0.015202235 | 0.202133425 | 0.178989281 | ANXA2/ACTR2/RNASE2/MAN2B1 | 4 |
| CC | GO:0001750 | photoreceptor outer segment | 4/204 | 92/19550 | 0.015766899 | 0.202154172 | 0.179007653 | LYAR/BSG/GNA11/GNAQ | 4 |
| CC | GO:0098562 | cytoplasmic side of membrane | 6/204 | 197/19550 | 0.01748748 | 0.21648294 | 0.191695786 | GNG2/LYN/TRAF3/GNA11/GNG5/GNAQ | 6 |
| CC | GO:0042734 | presynaptic membrane | 5/204 | 146/19550 | 0.018626998 | 0.222903074 | 0.197380819 | PCDH17/NCSTN/ADORA1/NPTN/PICK1 | 5 |
| CC | GO:0097038 | perinuclear endoplasmic reticulum | 2/204 | 21/19550 | 0.019973902 | 0.231310675 | 0.204825755 | CISD2/CYBB | 2 |
| CC | GO:0098533 | ATPase dependent transmembrane transport complex | 2/204 | 24/19550 | 0.02572161 | 0.271932213 | 0.240796154 | FXYD1/ATP1B2 | 2 |
| CC | GO:0042470 | melanosome | 4/204 | 109/19550 | 0.027421962 | 0.271932213 | 0.240796154 | ANXA2/NCSTN/BSG/RPN1 | 4 |
| CC | GO:0048770 | pigment granule | 4/204 | 109/19550 | 0.027421962 | 0.271932213 | 0.240796154 | ANXA2/NCSTN/BSG/RPN1 | 4 |
| CC | GO:0005770 | late endosome | 7/204 | 282/19550 | 0.028902248 | 0.271932213 | 0.240796154 | ANXA2/GJA1/ATP7B/VPS37B/PLD1/RHOB/CHMP7 | 7 |
| CC | GO:0016363 | nuclear matrix | 4/204 | 111/19550 | 0.029056343 | 0.271932213 | 0.240796154 | PSPC1/CFL1/ATN1/DDX39B | 4 |
| CC | GO:0097730 | non-motile cilium | 5/204 | 165/19550 | 0.029614697 | 0.271932213 | 0.240796154 | GLIS2/LYAR/BSG/GNA11/GNAQ | 5 |
| CC | GO:0036452 | ESCRT complex | 2/204 | 27/19550 | 0.032052718 | 0.271932213 | 0.240796154 | VPS37B/CHMP7 | 2 |
| CC | GO:0005912 | adherens junction | 5/204 | 170/19550 | 0.033063243 | 0.271932213 | 0.240796154 | ANXA2/LYN/DDX6/S100A11/SYNM | 5 |
| CC | GO:0031968 | organelle outer membrane | 6/204 | 230/19550 | 0.033940806 | 0.271932213 | 0.240796154 | GJA1/BCL2/CISD2/EMD/IFI27/DMPK | 6 |
| CC | GO:0005640 | nuclear outer membrane | 2/204 | 28/19550 | 0.034285536 | 0.271932213 | 0.240796154 | EMD/DMPK | 2 |
| CC | GO:0016323 | basolateral plasma membrane | 6/204 | 231/19550 | 0.034555521 | 0.271932213 | 0.240796154 | ANXA2/ATP7B/ADORA1/BSG/SLC22A1/CLDN7 | 6 |
| CC | GO:0019867 | outer membrane | 6/204 | 232/19550 | 0.035177396 | 0.271932213 | 0.240796154 | GJA1/BCL2/CISD2/EMD/IFI27/DMPK | 6 |
| CC | GO:0098982 | GABA-ergic synapse | 3/204 | 69/19550 | 0.035487951 | 0.271932213 | 0.240796154 | PCDH17/SLC6A17/NPTN | 3 |
| CC | GO:0005775 | vacuolar lumen | 5/204 | 174/19550 | 0.035995153 | 0.271932213 | 0.240796154 | ANXA2/ACTR2/LIPA/RNASE2/MAN2B1 | 5 |
| CC | GO:0098984 | neuron to neuron synapse | 8/204 | 361/19550 | 0.036154076 | 0.271932213 | 0.240796154 | ACTR2/LYN/ADORA1/ATP1B2/PRNP/NPTN/PICK1/MINK1 | 8 |
| CC | GO:0002102 | podosome | 2/204 | 29/19550 | 0.036577092 | 0.271932213 | 0.240796154 | ACTR2/TPM4 | 2 |
| CC | GO:0101031 | chaperone complex | 2/204 | 29/19550 | 0.036577092 | 0.271932213 | 0.240796154 | TCP1/PPP5C | 2 |
| CC | GO:0097733 | photoreceptor cell cilium | 4/204 | 120/19550 | 0.037116096 | 0.271932213 | 0.240796154 | LYAR/BSG/GNA11/GNAQ | 4 |
| CC | GO:0043679 | axon terminus | 4/204 | 122/19550 | 0.039064842 | 0.279956444 | 0.247901616 | CRHR2/ADORA1/PRNP/ITGA2 | 4 |
| CC | GO:0035861 | site of double-strand break | 3/204 | 73/19550 | 0.040886291 | 0.279956444 | 0.247901616 | ACTR2/RBBP8/ZBTB7A | 3 |
| CC | GO:0070821 | tertiary granule membrane | 3/204 | 73/19550 | 0.040886291 | 0.279956444 | 0.247901616 | CYBB/PLD1/CD93 | 3 |
| CC | GO:0008305 | integrin complex | 2/204 | 31/19550 | 0.041330617 | 0.279956444 | 0.247901616 | LYN/ITGA2 | 2 |
| CC | GO:0030667 | secretory granule membrane | 7/204 | 311/19550 | 0.045129315 | 0.300026369 | 0.265673548 | CYBB/NCSTN/PLD1/BSG/ICA1/CD93/ABCA13 | 7 |
| CC | GO:0070160 | tight junction | 4/204 | 129/19550 | 0.046338599 | 0.302464671 | 0.267832665 | GJA1/WNK4/CLDN11/CLDN7 | 4 |
| CC | GO:0034399 | nuclear periphery | 4/204 | 130/19550 | 0.047435202 | 0.304093529 | 0.269275021 | PSPC1/CFL1/ATN1/DDX39B | 4 |
| CC | GO:0097731 | 9+0 non-motile cilium | 4/204 | 131/19550 | 0.04854615 | 0.305755575 | 0.270746763 | LYAR/BSG/GNA11/GNAQ | 4 |
| MF | GO:0098631 | cell adhesion mediator activity | 6/206 | 59/18368 | 5.08E-05 | 0.024951722 | 0.023536837 | ANXA2/IGSF9/BSG/NPTN/S100A11/ITGA2 | 6 |
| MF | GO:0098632 | cell-cell adhesion mediator activity | 5/206 | 49/18368 | 0.000215821 | 0.052984051 | 0.049979596 | ANXA2/IGSF9/BSG/NPTN/S100A11 | 5 |
| MF | GO:0004559 | alpha-mannosidase activity | 3/206 | 15/18368 | 0.000572647 | 0.085801034 | 0.080935695 | MAN2A1/EDEM2/MAN2B1 | 3 |
| MF | GO:0015923 | mannosidase activity | 3/206 | 16/18368 | 0.00069899 | 0.085801034 | 0.080935695 | MAN2A1/EDEM2/MAN2B1 | 3 |
| MF | GO:0031683 | G-protein beta/gamma-subunit complex binding | 3/206 | 20/18368 | 0.00137669 | 0.126362598 | 0.11919722 | ADORA1/GNA11/GNAQ | 3 |
| MF | GO:0019003 | GDP binding | 5/206 | 75/18368 | 0.001544146 | 0.126362598 | 0.11919722 | RIT1/RHOB/DIRAS3/RAB11B/TRIM23 | 5 |
| MF | GO:0001664 | G protein-coupled receptor binding | 10/206 | 295/18368 | 0.001883216 | 0.132094179 | 0.124603792 | WNT10B/WNT2/PYY/ASIP/CKLF/ADORA1/PRNP/PICK1/GNA11/GNAQ | 10 |
| MF | GO:0017046 | peptide hormone binding | 4/206 | 52/18368 | 0.002731371 | 0.153962954 | 0.1452325 | RAMP2/INHBA/GIPR/CRHR2 | 4 |
| MF | GO:0042562 | hormone binding | 5/206 | 86/18368 | 0.002822132 | 0.153962954 | 0.1452325 | RAMP2/INHBA/GIPR/CRHR2/ADIPOR1 | 5 |
| MF | GO:0046625 | sphingolipid binding | 3/206 | 29/18368 | 0.004097526 | 0.198811786 | 0.187538184 | PLEKHA8/LYN/CLN8 | 3 |
| MF | GO:0070566 | adenylyltransferase activity | 3/206 | 30/18368 | 0.004515581 | 0.198811786 | 0.187538184 | PAPSS1/OAS1/MOCS3 | 3 |
| MF | GO:0003924 | GTPase activity | 10/206 | 337/18368 | 0.004858944 | 0.198811786 | 0.187538184 | MX1/RAC3/RIT1/RHOB/DIRAS3/RAB11B/GNA11/TRIM23/GNG5/GNAQ | 10 |
| MF | GO:0015924 | mannosyl-oligosaccharide mannosidase activity | 2/206 | 10/18368 | 0.005308739 | 0.200506998 | 0.189137269 | MAN2A1/EDEM2 | 2 |
| MF | GO:0003925 | G protein activity | 3/206 | 40/18368 | 0.010125078 | 0.302333991 | 0.285190173 | RAC3/RIT1/RAB11B | 3 |
| MF | GO:0005525 | GTP binding | 10/206 | 377/18368 | 0.010327766 | 0.302333991 | 0.285190173 | MX1/RAC3/IRGQ/RIT1/RHOB/DIRAS3/RAB11B/GNA11/TRIM23/GNAQ | 10 |
| MF | GO:0044548 | S100 protein binding | 2/206 | 14/18368 | 0.010423636 | 0.302333991 | 0.285190173 | ANXA2/S100A11 | 2 |
| MF | GO:0045296 | cadherin binding | 9/206 | 332/18368 | 0.012857527 | 0.302333991 | 0.285190173 | ANXA2/EMD/PFN1/PHLDB2/RAB11B/DDX6/BSG/S100A11/CALD1 | 9 |
| MF | GO:0005521 | lamin binding | 2/206 | 16/18368 | 0.013544913 | 0.302333991 | 0.285190173 | IFI27/PRNP | 2 |
| MF | GO:0019001 | guanyl nucleotide binding | 10/206 | 398/18368 | 0.014634048 | 0.302333991 | 0.285190173 | MX1/RAC3/IRGQ/RIT1/RHOB/DIRAS3/RAB11B/GNA11/TRIM23/GNAQ | 10 |
| MF | GO:0032561 | guanyl ribonucleotide binding | 10/206 | 398/18368 | 0.014634048 | 0.302333991 | 0.285190173 | MX1/RAC3/IRGQ/RIT1/RHOB/DIRAS3/RAB11B/GNA11/TRIM23/GNAQ | 10 |
| MF | GO:0140678 | molecular function inhibitor activity | 5/206 | 128/18368 | 0.014731541 | 0.302333991 | 0.285190173 | ANXA2/BCL2/WNK4/LYAR/PINX1 | 5 |
| MF | GO:0061980 | regulatory RNA binding | 3/206 | 46/18368 | 0.01481433 | 0.302333991 | 0.285190173 | ZC3H7B/SOX4/TLR7 | 3 |
| MF | GO:0031489 | myosin V binding | 2/206 | 17/18368 | 0.015238664 | 0.302333991 | 0.285190173 | RAB11B/FUS | 2 |
| MF | GO:0043395 | heparan sulfate proteoglycan binding | 2/206 | 17/18368 | 0.015238664 | 0.302333991 | 0.285190173 | HPSE2/ITGA2 | 2 |
| MF | GO:0016779 | nucleotidyltransferase activity | 5/206 | 132/18368 | 0.016622807 | 0.302333991 | 0.285190173 | PAPSS1/OAS1/MOCS3/TERF2/CDS2 | 5 |
| MF | GO:0098641 | cadherin binding involved in cell-cell adhesion | 2/206 | 18/18368 | 0.017018268 | 0.302333991 | 0.285190173 | ANXA2/S100A11 | 2 |
| MF | GO:0044325 | transmembrane transporter binding | 5/206 | 133/18368 | 0.017119651 | 0.302333991 | 0.285190173 | FXYD1/HRC/LYN/PRNP/NPTN | 5 |
| MF | GO:0048306 | calcium-dependent protein binding | 4/206 | 88/18368 | 0.017241042 | 0.302333991 | 0.285190173 | ANXA2/VPS37B/RAC3/S100A11 | 4 |
| MF | GO:0031681 | G-protein beta-subunit binding | 2/206 | 20/18368 | 0.020826598 | 0.326082838 | 0.307592344 | GNG2/GNG5 | 2 |
| MF | GO:0097001 | ceramide binding | 2/206 | 20/18368 | 0.020826598 | 0.326082838 | 0.307592344 | PLEKHA8/CLN8 | 2 |
| MF | GO:0004553 | hydrolase activity, hydrolyzing O-glycosyl compounds | 4/206 | 94/18368 | 0.021417636 | 0.326082838 | 0.307592344 | MAN2A1/EDEM2/HPSE2/MAN2B1 | 4 |
| MF | GO:0070851 | growth factor receptor binding | 5/206 | 141/18368 | 0.021451613 | 0.326082838 | 0.307592344 | FGF2/NCSTN/LYN/SOCS5/NPTN | 5 |
| MF | GO:0001848 | complement binding | 2/206 | 21/18368 | 0.022851194 | 0.326082838 | 0.307592344 | CFB/CD93 | 2 |
| MF | GO:0005178 | integrin binding | 5/206 | 144/18368 | 0.023244194 | 0.326082838 | 0.307592344 | FGF2/EDIL3/LYN/FBN1/ITGA2 | 5 |
| MF | GO:0016798 | hydrolase activity, acting on glycosyl bonds | 5/206 | 144/18368 | 0.023244194 | 0.326082838 | 0.307592344 | MAN2A1/TLR7/EDEM2/HPSE2/MAN2B1 | 5 |
| MF | GO:0030374 | nuclear receptor coactivator activity | 3/206 | 56/18368 | 0.024944907 | 0.331025658 | 0.312254882 | FGF2/KDM1A/CALCOCO1 | 3 |
| MF | GO:0050840 | extracellular matrix binding | 3/206 | 56/18368 | 0.024944907 | 0.331025658 | 0.312254882 | ANXA2/TINAGL1/ITGA2 | 3 |
| MF | GO:0005104 | fibroblast growth factor receptor binding | 2/206 | 25/18368 | 0.031705903 | 0.408219609 | 0.385071558 | FGF2/NPTN | 2 |
| MF | GO:1990841 | promoter-specific chromatin binding | 3/206 | 62/18368 | 0.032424775 | 0.408219609 | 0.385071558 | PCGF1/KDM1A/DNMT1 | 3 |
| MF | GO:0140297 | DNA-binding transcription factor binding | 9/206 | 394/18368 | 0.034084862 | 0.418391676 | 0.394666818 | BCL2/KDM1A/IFI27/RBBP8/DHX33/ZBTB7A/LYAR/PRRX1/FUS | 9 |
| MF | GO:0016866 | intramolecular transferase activity | 2/206 | 27/18368 | 0.036560201 | 0.426489208 | 0.402305181 | TRUB1/PGM2L1 | 2 |
| MF | GO:0033218 | amide binding | 9/206 | 400/18368 | 0.036969032 | 0.426489208 | 0.402305181 | RAMP2/INHBA/GIPR/CRHR2/PLEKHA8/SOAT1/PRNP/CLN8/ITGA2 | 9 |
| MF | GO:0043236 | laminin binding | 2/206 | 28/18368 | 0.039087606 | 0.426489208 | 0.402305181 | TINAGL1/ITGA2 | 2 |
| MF | GO:0050681 | androgen receptor binding | 2/206 | 28/18368 | 0.039087606 | 0.426489208 | 0.402305181 | KDM1A/ZBTB7A | 2 |
| MF | GO:0051861 | glycolipid binding | 2/206 | 28/18368 | 0.039087606 | 0.426489208 | 0.402305181 | PLEKHA8/LYN | 2 |
| MF | GO:0005518 | collagen binding | 3/206 | 69/18368 | 0.042461395 | 0.453229241 | 0.427528923 | AEBP1/DDR2/ITGA2 | 3 |
| MF | GO:0005184 | neuropeptide hormone activity | 2/206 | 30/18368 | 0.044334026 | 0.457109688 | 0.431189329 | PYY/ASIP | 2 |
| MF | GO:0005201 | extracellular matrix structural constituent | 5/206 | 172/18368 | 0.044686894 | 0.457109688 | 0.431189329 | FGL2/EDIL3/TINAGL1/AEBP1/FBN1 | 5 |
| MF | GO:0005179 | hormone activity | 4/206 | 122/18368 | 0.04862072 | 0.467583411 | 0.441069141 | INHBA/PYY/FBN1/ASIP | 4 |
| MF | GO:0005125 | cytokine activity | 6/206 | 235/18368 | 0.049536299 | 0.467583411 | 0.441069141 | INHBA/FGF2/WNT10B/WNT2/CTF1/CKLF | 6 |
| MF | GO:0003712 | transcription coregulator activity | 10/206 | 489/18368 | 0.049543039 | 0.467583411 | 0.441069141 | FGF2/PSIP1/KDM1A/RBBP8/TAF15/MED29/CALCOCO1/TLE3/FUS/ATN1 | 10 |

**Table S2** KEGG enrichment items information for DE-BMRGs.

| ID | Description | GeneRatio | BgRatio | pvalue | p.adjust | qvalue | geneID | Count |
| --- | --- | --- | --- | --- | --- | --- | --- | --- |
| hsa05222 | Small cell lung cancer | 5/124 | 92/8225 | 0.012448889 | 0.555167515 | 0.537448154 | 596/79444/7187/10912/3673 | 5 |
| hsa04730 | Long-term depression | 4/124 | 60/8225 | 0.012530711 | 0.555167515 | 0.537448154 | 4067/8681/2767/2776 | 4 |
| hsa04310 | Wnt signaling pathway | 7/124 | 170/8225 | 0.014196171 | 0.555167515 | 0.537448154 | 27123/894/7480/5881/7472/166336/7090 | 7 |
| hsa04666 | Fc gamma R-mediated phagocytosis | 5/124 | 97/8225 | 0.015377972 | 0.555167515 | 0.537448154 | 10097/5337/4067/8681/1072 | 5 |
| hsa05231 | Choline metabolism in cancer | 5/124 | 98/8225 | 0.016014552 | 0.555167515 | 0.537448154 | 5881/1119/5337/8681/6580 | 5 |
| hsa05162 | Measles | 6/124 | 139/8225 | 0.018371295 | 0.555167515 | 0.537448154 | 4938/894/4599/596/51284/7187 | 6 |
| hsa04064 | NF-kappa B signaling pathway | 5/124 | 104/8225 | 0.020205111 | 0.555167515 | 0.537448154 | 596/115650/4067/7187/10912 | 5 |
| hsa04621 | NOD-like receptor signaling pathway | 7/124 | 186/8225 | 0.022151593 | 0.555167515 | 0.537448154 | 4938/596/55054/1536/114769/56919/7187 | 7 |
| hsa04725 | Cholinergic synapse | 5/124 | 113/8225 | 0.027742671 | 0.555167515 | 0.537448154 | 54331/596/2767/2787/2776 | 5 |
| hsa04724 | Glutamatergic synapse | 5/124 | 114/8225 | 0.028676735 | 0.555167515 | 0.537448154 | 54331/5337/8681/2787/2776 | 5 |
| hsa04934 | Cushing syndrome | 6/124 | 155/8225 | 0.029479707 | 0.555167515 | 0.537448154 | 7480/1586/7472/1395/2767/2776 | 6 |
| hsa03040 | Spliceosome | 6/124 | 156/8225 | 0.030293662 | 0.555167515 | 0.537448154 | 51729/10262/2521/7919/11338/22916 | 6 |
| hsa01210 | 2-Oxocarboxylic acid metabolism | 2/124 | 19/8225 | 0.032614243 | 0.555167515 | 0.537448154 | 3419/587 | 2 |
| hsa04071 | Sphingolipid signaling pathway | 5/124 | 119/8225 | 0.033645601 | 0.555167515 | 0.537448154 | 596/5881/5337/134/2776 | 5 |
| hsa00100 | Steroid biosynthesis | 2/124 | 20/8225 | 0.035886819 | 0.555167515 | 0.537448154 | 3988/6646 | 2 |
| hsa00510 | N-Glycan biosynthesis | 3/124 | 50/8225 | 0.039238151 | 0.555167515 | 0.537448154 | 4124/6184/84620 | 3 |
| hsa05170 | Human immunodeficiency virus 1 infection | 7/124 | 212/8225 | 0.040918629 | 0.555167515 | 0.537448154 | 54331/596/5881/1072/2767/2787/2776 | 7 |
| hsa04540 | Gap junction | 4/124 | 88/8225 | 0.043570718 | 0.555167515 | 0.537448154 | 2697/1902/2767/2776 | 4 |
| hsa05164 | Influenza A | 6/124 | 171/8225 | 0.04430422 | 0.555167515 | 0.537448154 | 4938/4599/51284/9230/7187/11100 | 6 |
| hsa05410 | Hypertrophic cardiomyopathy | 4/124 | 90/8225 | 0.04667699 | 0.555167515 | 0.537448154 | 51422/2010/7171/3673 | 4 |

**Table S3** Detailed information for 937 TF mRNA pairs.

| node1 | node2 |
| --- | --- |
| ACTR2 | AHR |
| ACTR2 | AHRR |
| ACTR2 | AR |
| ACTR2 | ARID3A |
| ACTR2 | ATF1 |
| ACTR2 | ATF3 |
| ACTR2 | CDC5L |
| ACTR2 | CEBPB |
| ACTR2 | CEBPD |
| ACTR2 | CEBPZ |
| ACTR2 | CENPA |
| ACTR2 | CENPBD1 |
| ACTR2 | CGGBP1 |
| ACTR2 | CREB3 |
| ACTR2 | CREBL2 |
| ACTR2 | DBP |
| ACTR2 | DDIT3 |
| ACTR2 | DMRTA1 |
| ACTR2 | DR1 |
| ACTR2 | DUX4 |
| ACTR2 | E2F3 |
| ACTR2 | E2F4 |
| ACTR2 | EBF1 |
| ACTR2 | EEA1 |
| ACTR2 | EGR1 |
| ACTR2 | ELK1 |
| ACTR2 | ELK4 |
| ACTR2 | EOMES |
| ACTR2 | ETS1 |
| ACTR2 | ETV6 |
| ACTR2 | FLI1 |
| ACTR2 | FOXA1 |
| ACTR2 | FOXI3 |
| ACTR2 | FOXN2 |
| ACTR2 | FOXO3 |
| ACTR2 | GABPA |
| ACTR2 | GATA1 |
| ACTR2 | GFI1 |
| ACTR2 | GLYR1 |
| ACTR2 | GPBP1L1 |
| ACTR2 | GTF2B |
| ACTR2 | GTF2IRD1 |
| ACTR2 | GTF2IRD2B |
| ACTR2 | GZF1 |
| ACTR2 | HIF1A |
| ACTR2 | HIF3A |
| ACTR2 | HMX2 |
| ACTR2 | HOXC9 |
| ACTR2 | HSF4 |
| ACTR2 | IRF1 |
| ACTR2 | IRF3 |
| ACTR2 | IRF8 |
| ACTR2 | JRKL |
| ACTR2 | KDM5B |
| ACTR2 | KLF13 |
| ACTR2 | LIN54 |
| ACTR2 | MAFK |
| ACTR2 | MAX |
| ACTR2 | MAZ |
| ACTR2 | MBD2 |
| ACTR2 | MEIS1 |
| ACTR2 | MESP2 |
| ACTR2 | MLX |
| ACTR2 | MTERF1 |
| ACTR2 | MTERF2 |
| ACTR2 | MXI1 |
| ACTR2 | MYB |
| ACTR2 | MYBL1 |
| ACTR2 | MYBL2 |
| ACTR2 | MYC |
| ACTR2 | MYCN |
| ACTR2 | NANOG |
| ACTR2 | NCOA3 |
| ACTR2 | NEUROD2 |
| ACTR2 | NFYA |
| ACTR2 | NFYB |
| ACTR2 | NME2 |
| ACTR2 | NR2C2 |
| ACTR2 | NR3C1 |
| ACTR2 | OLIG2 |
| ACTR2 | PAX5 |
| ACTR2 | PBX3 |
| ACTR2 | POU5F1 |
| ACTR2 | POU6F2 |
| ACTR2 | PRDM16 |
| ACTR2 | PURB |
| ACTR2 | RAG1 |
| ACTR2 | RELA |
| ACTR2 | RFX5 |
| ACTR2 | RFX7 |
| ACTR2 | RUNX1 |
| ACTR2 | RUNX2 |
| ACTR2 | SAFB |
| ACTR2 | SETDB1 |
| ACTR2 | SMAD1 |
| ACTR2 | SOX2 |
| ACTR2 | SP1 |
| ACTR2 | SP2 |
| ACTR2 | SP3 |
| ACTR2 | SP4 |
| ACTR2 | SPI1 |
| ACTR2 | SREBF2 |
| ACTR2 | STAT1 |
| ACTR2 | STAT3 |
| ACTR2 | STAT4 |
| ACTR2 | TBX5 |
| ACTR2 | TCF3 |
| ACTR2 | TEAD4 |
| ACTR2 | TET3 |
| ACTR2 | TFAP2A |
| ACTR2 | TFAP2C |
| ACTR2 | TFCP2 |
| ACTR2 | TFDP1 |
| ACTR2 | THAP12 |
| ACTR2 | THAP3 |
| ACTR2 | THAP7 |
| ACTR2 | TRERF1 |
| ACTR2 | UBP1 |
| ACTR2 | VDR |
| ACTR2 | YY1 |
| ACTR2 | ZBTB11 |
| ACTR2 | ZBTB14 |
| ACTR2 | ZBTB16 |
| ACTR2 | ZBTB2 |
| ACTR2 | ZBTB24 |
| ACTR2 | ZBTB33 |
| ACTR2 | ZBTB34 |
| ACTR2 | ZBTB6 |
| ACTR2 | ZFP64 |
| ACTR2 | ZFP69 |
| ACTR2 | ZFP69B |
| ACTR2 | ZFP91 |
| ACTR2 | ZKSCAN4 |
| ACTR2 | ZNF114 |
| ACTR2 | ZNF133 |
| ACTR2 | ZNF135 |
| ACTR2 | ZNF146 |
| ACTR2 | ZNF148 |
| ACTR2 | ZNF16 |
| ACTR2 | ZNF177 |
| ACTR2 | ZNF207 |
| ACTR2 | ZNF215 |
| ACTR2 | ZNF217 |
| ACTR2 | ZNF281 |
| ACTR2 | ZNF32 |
| ACTR2 | ZNF346 |
| ACTR2 | ZNF41 |
| ACTR2 | ZNF415 |
| ACTR2 | ZNF454 |
| ACTR2 | ZNF462 |
| ACTR2 | ZNF512 |
| ACTR2 | ZNF517 |
| ACTR2 | ZNF544 |
| ACTR2 | ZNF557 |
| ACTR2 | ZNF576 |
| ACTR2 | ZNF577 |
| ACTR2 | ZNF584 |
| ACTR2 | ZNF597 |
| ACTR2 | ZNF599 |
| ACTR2 | ZNF610 |
| ACTR2 | ZNF611 |
| ACTR2 | ZNF620 |
| ACTR2 | ZNF625 |
| ACTR2 | ZNF662 |
| ACTR2 | ZNF669 |
| ACTR2 | ZNF674 |
| ACTR2 | ZNF695 |
| ACTR2 | ZNF71 |
| ACTR2 | ZNF724 |
| ACTR2 | ZNF747 |
| ACTR2 | ZNF770 |
| ACTR2 | ZNF771 |
| ACTR2 | ZNF813 |
| ACTR2 | ZNF845 |
| ACTR2 | ZNF875 |
| ACTR2 | ZNF92 |
| ACTR2 | ZNF93 |
| ACTR2 | ZNF98 |
| ACTR2 | ZSCAN1 |
| ACTR2 | ZSCAN2 |
| ACTR2 | ZSCAN21 |
| ACTR2 | ZUP1 |
| ANXA2 | AHR |
| ANXA2 | AIRE |
| ANXA2 | AKAP8 |
| ANXA2 | AKAP8L |
| ANXA2 | ALX1 |
| ANXA2 | ALX4 |
| ANXA2 | ANKZF1 |
| ANXA2 | AR |
| ANXA2 | ARID2 |
| ANXA2 | ARID3A |
| ANXA2 | ARID5B |
| ANXA2 | ARNTL |
| ANXA2 | ARNTL2 |
| ANXA2 | ASCL2 |
| ANXA2 | ATF3 |
| ANXA2 | ATF4 |
| ANXA2 | ATF5 |
| ANXA2 | BACH1 |
| ANXA2 | BATF |
| ANXA2 | BBX |
| ANXA2 | BCL6 |
| ANXA2 | BNC1 |
| ANXA2 | BNC2 |
| ANXA2 | CDX2 |
| ANXA2 | CEBPA |
| ANXA2 | CEBPB |
| ANXA2 | CEBPE |
| ANXA2 | CEBPG |
| ANXA2 | CENPB |
| ANXA2 | CENPT |
| ANXA2 | CLOCK |
| ANXA2 | CREB3 |
| ANXA2 | CREB3L1 |
| ANXA2 | CREB3L2 |
| ANXA2 | CREM |
| ANXA2 | CTCF |
| ANXA2 | CTCFL |
| ANXA2 | CUX1 |
| ANXA2 | CXXC1 |
| ANXA2 | DDIT3 |
| ANXA2 | DR1 |
| ANXA2 | DRAP1 |
| ANXA2 | E2F1 |
| ANXA2 | E2F4 |
| ANXA2 | E2F6 |
| ANXA2 | E2F7 |
| ANXA2 | EEA1 |
| ANXA2 | EGR1 |
| ANXA2 | EHF |
| ANXA2 | ELF3 |
| ANXA2 | ELF4 |
| ANXA2 | ELK1 |
| ANXA2 | ELK3 |
| ANXA2 | EOMES |
| ANXA2 | EPAS1 |
| ANXA2 | ESR1 |
| ANXA2 | ETS1 |
| ANXA2 | ETS2 |
| ANXA2 | ETV4 |
| ANXA2 | ETV5 |
| ANXA2 | ETV6 |
| ANXA2 | FLI1 |
| ANXA2 | FOS |
| ANXA2 | FOSB |
| ANXA2 | FOSL1 |
| ANXA2 | FOSL2 |
| ANXA2 | FOXA1 |
| ANXA2 | FOXA2 |
| ANXA2 | FOXC1 |
| ANXA2 | FOXC2 |
| ANXA2 | FOXD1 |
| ANXA2 | FOXK1 |
| ANXA2 | FOXM1 |
| ANXA2 | FOXO1 |
| ANXA2 | FOXO3 |
| ANXA2 | FOXP1 |
| ANXA2 | FOXQ1 |
| ANXA2 | GATA2 |
| ANXA2 | GATA3 |
| ANXA2 | GATA4 |
| ANXA2 | GATA6 |
| ANXA2 | GATAD2A |
| ANXA2 | GCM1 |
| ANXA2 | GFI1 |
| ANXA2 | GLIS1 |
| ANXA2 | GLIS3 |
| ANXA2 | GRHL2 |
| ANXA2 | GTF2B |
| ANXA2 | GTF3A |
| ANXA2 | HBP1 |
| ANXA2 | HES1 |
| ANXA2 | HES6 |
| ANXA2 | HHEX |
| ANXA2 | HIF1A |
| ANXA2 | HLX |
| ANXA2 | HMG20A |
| ANXA2 | HMG20B |
| ANXA2 | HMGA1 |
| ANXA2 | HMGA2 |
| ANXA2 | HNF1B |
| ANXA2 | HNF4A |
| ANXA2 | HOXA1 |
| ANXA2 | HOXA3 |
| ANXA2 | HOXB13 |
| ANXA2 | HOXB4 |
| ANXA2 | HOXB7 |
| ANXA2 | HOXC11 |
| ANXA2 | HOXC4 |
| ANXA2 | HOXC6 |
| ANXA2 | HOXD4 |
| ANXA2 | HSF1 |
| ANXA2 | IRF1 |
| ANXA2 | IRF2 |
| ANXA2 | IRF3 |
| ANXA2 | IRF5 |
| ANXA2 | IRF6 |
| ANXA2 | IRF7 |
| ANXA2 | IRF8 |
| ANXA2 | IRF9 |
| ANXA2 | IRX1 |
| ANXA2 | IRX3 |
| ANXA2 | JDP2 |
| ANXA2 | JUN |
| ANXA2 | JUNB |
| ANXA2 | JUND |
| ANXA2 | KCMF1 |
| ANXA2 | KLF10 |
| ANXA2 | KLF13 |
| ANXA2 | KLF2 |
| ANXA2 | KLF3 |
| ANXA2 | KLF4 |
| ANXA2 | KLF5 |
| ANXA2 | KLF6 |
| ANXA2 | KLF7 |
| ANXA2 | KLF9 |
| ANXA2 | LEF1 |
| ANXA2 | LHX2 |
| ANXA2 | LYL1 |
| ANXA2 | MAF |
| ANXA2 | MAFB |
| ANXA2 | MAFF |
| ANXA2 | MAFG |
| ANXA2 | MAFK |
| ANXA2 | MAX |
| ANXA2 | MBD1 |
| ANXA2 | MBD2 |
| ANXA2 | MBNL2 |
| ANXA2 | MECOM |
| ANXA2 | MEF2A |
| ANXA2 | MEF2C |
| ANXA2 | MITF |
| ANXA2 | MLX |
| ANXA2 | MSC |
| ANXA2 | MSX1 |
| ANXA2 | MXD1 |
| ANXA2 | MXD4 |
| ANXA2 | MXI1 |
| ANXA2 | MYB |
| ANXA2 | MYBL2 |
| ANXA2 | MYC |
| ANXA2 | MYF5 |
| ANXA2 | NCOA3 |
| ANXA2 | NFATC1 |
| ANXA2 | NFE2 |
| ANXA2 | NFE2L1 |
| ANXA2 | NFE2L2 |
| ANXA2 | NFE2L3 |
| ANXA2 | NFIA |
| ANXA2 | NFIB |
| ANXA2 | NFIC |
| ANXA2 | NFIL3 |
| ANXA2 | NFIX |
| ANXA2 | NFKB1 |
| ANXA2 | NFKB2 |
| ANXA2 | NFYC |
| ANXA2 | NME2 |
| ANXA2 | NR1D1 |
| ANXA2 | NR1D2 |
| ANXA2 | NR1H2 |
| ANXA2 | NR1H3 |
| ANXA2 | NR2F2 |
| ANXA2 | NR2F6 |
| ANXA2 | NR3C1 |
| ANXA2 | NR4A1 |
| ANXA2 | NR4A2 |
| ANXA2 | NR5A1 |
| ANXA2 | OTX2 |
| ANXA2 | PAX6 |
| ANXA2 | PAX8 |
| ANXA2 | PBX3 |
| ANXA2 | PDX1 |
| ANXA2 | PGR |
| ANXA2 | PLAGL1 |
| ANXA2 | POU2F2 |
| ANXA2 | PPARD |
| ANXA2 | PPARG |
| ANXA2 | PRDM1 |
| ANXA2 | PRDM14 |
| ANXA2 | PRDM4 |
| ANXA2 | PREB |
| ANXA2 | PRMT3 |
| ANXA2 | PROX1 |
| ANXA2 | PRRX1 |
| ANXA2 | PRRX2 |
| ANXA2 | RAG1 |
| ANXA2 | RARA |
| ANXA2 | RARB |
| ANXA2 | RARG |
| ANXA2 | RBPJ |
| ANXA2 | RELA |
| ANXA2 | RELB |
| ANXA2 | REPIN1 |
| ANXA2 | REST |
| ANXA2 | RFX2 |
| ANXA2 | RFX5 |
| ANXA2 | RFX8 |
| ANXA2 | RHOXF2 |
| ANXA2 | RREB1 |
| ANXA2 | RUNX1 |
| ANXA2 | RUNX2 |
| ANXA2 | RUNX3 |
| ANXA2 | RXRA |
| ANXA2 | SATB1 |
| ANXA2 | SIM1 |
| ANXA2 | SIX1 |
| ANXA2 | SKIL |
| ANXA2 | SMAD1 |
| ANXA2 | SMAD3 |
| ANXA2 | SMAD4 |
| ANXA2 | SNAI2 |
| ANXA2 | SOX11 |
| ANXA2 | SOX13 |
| ANXA2 | SOX2 |
| ANXA2 | SOX4 |
| ANXA2 | SOX9 |
| ANXA2 | SP1 |
| ANXA2 | SP100 |
| ANXA2 | SPI1 |
| ANXA2 | SREBF1 |
| ANXA2 | SREBF2 |
| ANXA2 | SRY |
| ANXA2 | STAT1 |
| ANXA2 | STAT2 |
| ANXA2 | STAT3 |
| ANXA2 | STAT5A |
| ANXA2 | STAT5B |
| ANXA2 | STAT6 |
| ANXA2 | TAL1 |
| ANXA2 | TBX3 |
| ANXA2 | TBX5 |
| ANXA2 | TCF12 |
| ANXA2 | TCF21 |
| ANXA2 | TCF4 |
| ANXA2 | TCF7L2 |
| ANXA2 | TEAD1 |
| ANXA2 | TEAD2 |
| ANXA2 | TEAD3 |
| ANXA2 | TEAD4 |
| ANXA2 | TERF2 |
| ANXA2 | TET1 |
| ANXA2 | TFAP2A |
| ANXA2 | TFAP2C |
| ANXA2 | TFCP2L1 |
| ANXA2 | TFDP1 |
| ANXA2 | TFDP2 |
| ANXA2 | TFE3 |
| ANXA2 | TGIF1 |
| ANXA2 | THAP4 |
| ANXA2 | TIGD6 |
| ANXA2 | TP53 |
| ANXA2 | TP63 |
| ANXA2 | TRAFD1 |
| ANXA2 | TRPS1 |
| ANXA2 | TSC22D1 |
| ANXA2 | TWIST1 |
| ANXA2 | TWIST2 |
| ANXA2 | UBP1 |
| ANXA2 | VDR |
| ANXA2 | VEZF1 |
| ANXA2 | XBP1 |
| ANXA2 | XPA |
| ANXA2 | YBX1 |
| ANXA2 | ZBED1 |
| ANXA2 | ZBTB33 |
| ANXA2 | ZBTB38 |
| ANXA2 | ZBTB4 |
| ANXA2 | ZBTB7A |
| ANXA2 | ZBTB7B |
| ANXA2 | ZC3H8 |
| ANXA2 | ZEB1 |
| ANXA2 | ZEB2 |
| ANXA2 | ZFHX3 |
| ANXA2 | ZFP28 |
| ANXA2 | ZFP57 |
| ANXA2 | ZHX1 |
| ANXA2 | ZHX2 |
| ANXA2 | ZHX3 |
| ANXA2 | ZKSCAN1 |
| ANXA2 | ZNF143 |
| ANXA2 | ZNF207 |
| ANXA2 | ZNF217 |
| ANXA2 | ZNF22 |
| ANXA2 | ZNF25 |
| ANXA2 | ZNF266 |
| ANXA2 | ZNF32 |
| ANXA2 | ZNF326 |
| ANXA2 | ZNF385A |
| ANXA2 | ZNF394 |
| ANXA2 | ZNF410 |
| ANXA2 | ZNF436 |
| ANXA2 | ZNF486 |
| ANXA2 | ZNF512 |
| ANXA2 | ZNF532 |
| ANXA2 | ZNF547 |
| ANXA2 | ZNF561 |
| ANXA2 | ZNF584 |
| ANXA2 | ZNF592 |
| ANXA2 | ZNF611 |
| ANXA2 | ZNF641 |
| ANXA2 | ZNF655 |
| ANXA2 | ZNF664 |
| ANXA2 | ZNF674 |
| ANXA2 | ZNF703 |
| ANXA2 | ZNF706 |
| ANXA2 | ZNF721 |
| ANXA2 | ZNF766 |
| ANXA2 | ZNF770 |
| ANXA2 | ZNF83 |
| ANXA2 | ZNF91 |
| ANXA2 | ZZZ3 |
| OAS1 | AHR |
| OAS1 | AR |
| OAS1 | ASCL2 |
| OAS1 | BACH2 |
| OAS1 | BATF |
| OAS1 | BATF2 |
| OAS1 | CBX2 |
| OAS1 | CEBPA |
| OAS1 | ELF1 |
| OAS1 | ETV3L |
| OAS1 | ETV7 |
| OAS1 | FOS |
| OAS1 | FOXA1 |
| OAS1 | HDX |
| OAS1 | HES4 |
| OAS1 | HESX1 |
| OAS1 | HNF4A |
| OAS1 | HOXA9 |
| OAS1 | IKZF1 |
| OAS1 | IKZF2 |
| OAS1 | IRF1 |
| OAS1 | IRF2 |
| OAS1 | IRF4 |
| OAS1 | IRF5 |
| OAS1 | IRF7 |
| OAS1 | IRF8 |
| OAS1 | IRF9 |
| OAS1 | MAFF |
| OAS1 | MAX |
| OAS1 | MSC |
| OAS1 | MTF1 |
| OAS1 | MXI1 |
| OAS1 | MYB |
| OAS1 | NFE2L3 |
| OAS1 | NFKB1 |
| OAS1 | NR3C1 |
| OAS1 | PAX5 |
| OAS1 | PLSCR1 |
| OAS1 | POU2AF1 |
| OAS1 | PPARG |
| OAS1 | RBCK1 |
| OAS1 | SP100 |
| OAS1 | SP110 |
| OAS1 | SP140 |
| OAS1 | SPI1 |
| OAS1 | SPIB |
| OAS1 | STAT1 |
| OAS1 | STAT2 |
| OAS1 | STAT3 |
| OAS1 | TBP |
| OAS1 | TBX19 |
| OAS1 | TCF7L2 |
| OAS1 | TERF1 |
| OAS1 | TFEC |
| OAS1 | TP63 |
| OAS1 | TRAFD1 |
| OAS1 | YY1 |
| OAS1 | ZBED2 |
| OAS1 | ZBTB32 |
| OAS1 | ZBTB48 |
| OAS1 | ZNF107 |
| OAS1 | ZNF165 |
| OAS1 | ZNF234 |
| OAS1 | ZNF257 |
| OAS1 | ZNF267 |
| OAS1 | ZNF296 |
| OAS1 | ZNF311 |
| OAS1 | ZNF354B |
| OAS1 | ZNF385A |
| OAS1 | ZNF415 |
| OAS1 | ZNF419 |
| OAS1 | ZNF439 |
| OAS1 | ZNF442 |
| OAS1 | ZNF443 |
| OAS1 | ZNF468 |
| OAS1 | ZNF485 |
| OAS1 | ZNF488 |
| OAS1 | ZNF501 |
| OAS1 | ZNF544 |
| OAS1 | ZNF552 |
| OAS1 | ZNF558 |
| OAS1 | ZNF57 |
| OAS1 | ZNF595 |
| OAS1 | ZNF600 |
| OAS1 | ZNF610 |
| OAS1 | ZNF613 |
| OAS1 | ZNF618 |
| OAS1 | ZNF619 |
| OAS1 | ZNF626 |
| OAS1 | ZNF658 |
| OAS1 | ZNF682 |
| OAS1 | ZNF684 |
| OAS1 | ZNF705A |
| OAS1 | ZNF75D |
| OAS1 | ZNF799 |
| OAS1 | ZNF80 |
| PFN1 | ARID2 |
| PFN1 | ARID3A |
| PFN1 | ARX |
| PFN1 | ASH1L |
| PFN1 | ATF2 |
| PFN1 | ATF3 |
| PFN1 | ATF4 |
| PFN1 | ATF6 |
| PFN1 | BACH1 |
| PFN1 | BATF |
| PFN1 | BATF3 |
| PFN1 | BAZ2B |
| PFN1 | BBX |
| PFN1 | BCL11A |
| PFN1 | BCL6 |
| PFN1 | BHLHE40 |
| PFN1 | BORCS8MEF2B |
| PFN1 | BPTF |
| PFN1 | CEBPB |
| PFN1 | CEBPD |
| PFN1 | CEBPZ |
| PFN1 | CENPB |
| PFN1 | CLOCK |
| PFN1 | CREB1 |
| PFN1 | CREM |
| PFN1 | CTCF |
| PFN1 | CUX1 |
| PFN1 | CXXC1 |
| PFN1 | CXXC4 |
| PFN1 | DACH1 |
| PFN1 | DEAF1 |
| PFN1 | DMTF1 |
| PFN1 | DNTTIP1 |
| PFN1 | DRAP1 |
| PFN1 | DZIP1 |
| PFN1 | E2F1 |
| PFN1 | E2F4 |
| PFN1 | E2F6 |
| PFN1 | E2F7 |
| PFN1 | EBF1 |
| PFN1 | EEA1 |
| PFN1 | EGR1 |
| PFN1 | ELF1 |
| PFN1 | ELK1 |
| PFN1 | ELK3 |
| PFN1 | ELK4 |
| PFN1 | ERF |
| PFN1 | ERG |
| PFN1 | ESRRA |
| PFN1 | ESRRG |
| PFN1 | ETS1 |
| PFN1 | ETV1 |
| PFN1 | ETV4 |
| PFN1 | ETV6 |
| PFN1 | FLI1 |
| PFN1 | FOS |
| PFN1 | FOSL1 |
| PFN1 | FOSL2 |
| PFN1 | FOXM1 |
| PFN1 | FOXO1 |
| PFN1 | FOXO3 |
| PFN1 | FOXP1 |
| PFN1 | FOXP2 |
| PFN1 | FOXP3 |
| PFN1 | GABPA |
| PFN1 | GATA2 |
| PFN1 | GATA4 |
| PFN1 | GATAD2A |
| PFN1 | GFI1B |
| PFN1 | GLIS3 |
| PFN1 | GPBP1 |
| PFN1 | GTF2B |
| PFN1 | GTF2IRD1 |
| PFN1 | GTF3A |
| PFN1 | HBP1 |
| PFN1 | HDX |
| PFN1 | HHEX |
| PFN1 | HMBOX1 |
| PFN1 | HMG20B |
| PFN1 | HMGA1 |
| PFN1 | HMGN3 |
| PFN1 | HNF4A |
| PFN1 | HNF4G |
| PFN1 | HOXA7 |
| PFN1 | HOXB2 |
| PFN1 | HOXB4 |
| PFN1 | HSF2 |
| PFN1 | IKZF1 |
| PFN1 | IKZF4 |
| PFN1 | IRF2 |
| PFN1 | IRF3 |
| PFN1 | IRF4 |
| PFN1 | ISL2 |
| PFN1 | JUN |
| PFN1 | JUNB |
| PFN1 | JUND |
| PFN1 | KDM5B |
| PFN1 | KLF1 |
| PFN1 | KLF13 |
| PFN1 | KLF4 |
| PFN1 | KLF5 |
| PFN1 | KLF6 |
| PFN1 | KLF7 |
| PFN1 | KLF9 |
| PFN1 | KMT2A |
| PFN1 | LCOR |
| PFN1 | MAF |
| PFN1 | MAFF |
| PFN1 | MAFK |
| PFN1 | MAX |
| PFN1 | MAZ |
| PFN1 | MBD3 |
| PFN1 | MBD4 |
| PFN1 | MEIS2 |
| PFN1 | MGA |
| PFN1 | MNT |
| PFN1 | MSANTD4 |
| PFN1 | MSGN1 |
| PFN1 | MTERF2 |
| PFN1 | MXI1 |
| PFN1 | MYB |
| PFN1 | MYC |
| PFN1 | MYCN |
| PFN1 | MYOD1 |
| PFN1 | MYOG |
| PFN1 | NANOG |
| PFN1 | NCOA3 |
| PFN1 | NEUROD1 |
| PFN1 | NEUROD2 |
| PFN1 | NFATC1 |
| PFN1 | NFE2 |
| PFN1 | NFE2L1 |
| PFN1 | NFE2L2 |
| PFN1 | NFIA |
| PFN1 | NFIC |
| PFN1 | NFKB1 |
| PFN1 | NFKB2 |
| PFN1 | NKX23 |
| PFN1 | NPAS3 |
| PFN1 | NR1D2 |
| PFN1 | NR1H2 |
| PFN1 | NR1H3 |
| PFN1 | NR2F2 |
| PFN1 | NR2F6 |
| PFN1 | NR3C1 |
| PFN1 | NR5A1 |
| PFN1 | NRF1 |
| PFN1 | PAX5 |
| PFN1 | PAX6 |
| PFN1 | PBX1 |
| PFN1 | PBX2 |
| PFN1 | PBX3 |
| PFN1 | PIN1 |
| PFN1 | PLAGL1 |
| PFN1 | POU2F1 |
| PFN1 | POU2F2 |
| PFN1 | POU5F1 |
| PFN1 | PPARG |
| PFN1 | PREB |
| PFN1 | RARA |
| PFN1 | RBSN |
| PFN1 | RELA |
| PFN1 | RELB |
| PFN1 | REST |
| PFN1 | RFX3 |
| PFN1 | RFX5 |
| PFN1 | RLF |
| PFN1 | RUNX1 |
| PFN1 | RUNX2 |
| PFN1 | RUNX3 |
| PFN1 | RXRA |
| PFN1 | SETBP1 |
| PFN1 | SETDB1 |
| PFN1 | SIM1 |
| PFN1 | SIX5 |
| PFN1 | SMAD1 |
| PFN1 | SMAD3 |
| PFN1 | SMAD4 |
| PFN1 | SMAD5 |
| PFN1 | SMAD9 |
| PFN1 | SNAPC2 |
| PFN1 | SOX11 |
| PFN1 | SOX6 |
| PFN1 | SP1 |
| PFN1 | SP100 |
| PFN1 | SP4 |
| PFN1 | SPI1 |
| PFN1 | SRF |
| PFN1 | STAT1 |
| PFN1 | STAT3 |
| PFN1 | STAT5A |
| PFN1 | STAT5B |
| PFN1 | STAT6 |
| PFN1 | TAL1 |
| PFN1 | TBP |
| PFN1 | TBX21 |
| PFN1 | TCF12 |
| PFN1 | TCF3 |
| PFN1 | TCF4 |
| PFN1 | TCF7L2 |
| PFN1 | TEAD1 |
| PFN1 | TEAD2 |
| PFN1 | TEAD4 |
| PFN1 | TERF1 |
| PFN1 | TFAP2A |
| PFN1 | TFAP2E |
| PFN1 | TFAP4 |
| PFN1 | TFDP1 |
| PFN1 | TGIF2 |
| PFN1 | THAP11 |
| PFN1 | TMF1 |
| PFN1 | TRAFD1 |
| PFN1 | TSC22D1 |
| PFN1 | TSHZ2 |
| PFN1 | TWIST1 |
| PFN1 | USF1 |
| PFN1 | USF2 |
| PFN1 | USF3 |
| PFN1 | VDR |
| PFN1 | VEZF1 |
| PFN1 | XBP1 |
| PFN1 | YBX1 |
| PFN1 | YY1 |
| PFN1 | ZBED1 |
| PFN1 | ZBED5 |
| PFN1 | ZBTB10 |
| PFN1 | ZBTB11 |
| PFN1 | ZBTB16 |
| PFN1 | ZBTB20 |
| PFN1 | ZBTB21 |
| PFN1 | ZBTB33 |
| PFN1 | ZBTB37 |
| PFN1 | ZBTB41 |
| PFN1 | ZBTB43 |
| PFN1 | ZBTB44 |
| PFN1 | ZBTB7A |
| PFN1 | ZEB1 |
| PFN1 | ZFHX4 |
| PFN1 | ZFP28 |
| PFN1 | ZFP57 |
| PFN1 | ZFP62 |
| PFN1 | ZFP69 |
| PFN1 | ZFP90 |
| PFN1 | ZFX |
| PFN1 | ZGPAT |
| PFN1 | ZHX1 |
| PFN1 | ZHX2 |
| PFN1 | ZKSCAN1 |
| PFN1 | ZKSCAN2 |
| PFN1 | ZKSCAN5 |
| PFN1 | ZMAT1 |
| PFN1 | ZNF10 |
| PFN1 | ZNF112 |
| PFN1 | ZNF117 |
| PFN1 | ZNF12 |
| PFN1 | ZNF133 |
| PFN1 | ZNF146 |
| PFN1 | ZNF148 |
| PFN1 | ZNF160 |
| PFN1 | ZNF174 |
| PFN1 | ZNF175 |
| PFN1 | ZNF177 |
| PFN1 | ZNF189 |
| PFN1 | ZNF197 |
| PFN1 | ZNF207 |
| PFN1 | ZNF229 |
| PFN1 | ZNF236 |
| PFN1 | ZNF24 |
| PFN1 | ZNF248 |
| PFN1 | ZNF251 |
| PFN1 | ZNF254 |
| PFN1 | ZNF260 |
| PFN1 | ZNF292 |
| PFN1 | ZNF296 |
| PFN1 | ZNF322 |
| PFN1 | ZNF326 |
| PFN1 | ZNF334 |
| PFN1 | ZNF337 |
| PFN1 | ZNF33A |
| PFN1 | ZNF354C |
| PFN1 | ZNF384 |
| PFN1 | ZNF408 |
| PFN1 | ZNF414 |
| PFN1 | ZNF418 |
| PFN1 | ZNF428 |
| PFN1 | ZNF433 |
| PFN1 | ZNF441 |
| PFN1 | ZNF449 |
| PFN1 | ZNF451 |
| PFN1 | ZNF460 |
| PFN1 | ZNF462 |
| PFN1 | ZNF484 |
| PFN1 | ZNF502 |
| PFN1 | ZNF511 |
| PFN1 | ZNF514 |
| PFN1 | ZNF518A |
| PFN1 | ZNF518B |
| PFN1 | ZNF521 |
| PFN1 | ZNF532 |
| PFN1 | ZNF561 |
| PFN1 | ZNF575 |
| PFN1 | ZNF577 |
| PFN1 | ZNF580 |
| PFN1 | ZNF608 |
| PFN1 | ZNF615 |
| PFN1 | ZNF623 |
| PFN1 | ZNF639 |
| PFN1 | ZNF644 |
| PFN1 | ZNF652 |
| PFN1 | ZNF654 |
| PFN1 | ZNF658 |
| PFN1 | ZNF678 |
| PFN1 | ZNF680 |
| PFN1 | ZNF704 |
| PFN1 | ZNF706 |
| PFN1 | ZNF711 |
| PFN1 | ZNF721 |
| PFN1 | ZNF740 |
| PFN1 | ZNF772 |
| PFN1 | ZNF780B |
| PFN1 | ZNF827 |
| PFN1 | ZNF837 |
| PFN1 | ZNF84 |
| PFN1 | ZNF841 |
| PFN1 | ZNF91 |
| PFN1 | ZSCAN23 |
| PFN1 | ZSCAN29 |
| PFN1 | ZSCAN31 |
| PFN1 | ZZZ3 |
